# Supplementary material
Source: MDPI journal article supplement (https://www.mdpi.com/2076-3417/14/1/281)
Supplement: s1 [file s1]

# Two Gracilioethers Containing a [2(5H)-Furanylidene]ethanoate Moiety and 9,10-Dihydroplakortone G: New Polyketides from the Caribbean Marine Sponge *Plakortis halichondrioides*

Luis A. Amador 1, Abimael D. Rodríguez 1,\*, Lesly Carmona-Sarabia 1, Emilee E. Colón-Lorenzo 2 and Adelfa E. Serrano 2

1 Molecular Sciences Research Center, University of Puerto Rico, 1390 Ponce de León Avenue, San Juan 00926, Puerto Rico; luisalberto.amador@upr.edu (L.A.A.); lesly.carmona@upr.edu (L.C.-S.)

2 Department of Microbiology and Medical Zoology, University of Puerto Rico School of Medicine, San Juan 00921, Puerto Rico; emilee.colon@upr.edu (E.E.C.-L.); adelfa.serrano@upr.edu (A.E.S.)

\* Corresponding author. Tel.: +1-787-523-5320; fax: +1-787-522-2150; e-mail: abimael.rodriguez1@upr.edu

## Supplementary Material

**Table S1.** NMR spectral data for plakortone G (**9**) in CDCl<sub>3</sub>.

| atom | $\delta_C^a$ , Type   | $\delta_H^b$ , mult ( <i>J</i> in Hz) | <sup>1</sup> H- <sup>1</sup> H COSY | <sup>1</sup> H- <sup>13</sup> C HMBC |
|------|-----------------------|---------------------------------------|-------------------------------------|--------------------------------------|
| 1    | 173.5, C              |                                       |                                     |                                      |
| 2    | 135.8, C              |                                       |                                     |                                      |
| 3    | 150.1, CH             | 6.82, br s                            |                                     | 1, 2, 4, 13                          |
| 4    | 89.3, C               |                                       |                                     |                                      |
| 5    | 37.2, CH <sub>2</sub> | 1.60, m                               |                                     | 3, 4, 15, 16                         |
|      |                       | 1.60, m                               |                                     | 3, 4, 15, 16                         |
| 6    | 21.2, CH <sub>2</sub> | 1.10-1.38, br m                       |                                     |                                      |
| 7    | 35.1, CH <sub>2</sub> | 1.10-1.38, br m                       |                                     | 8                                    |
|      |                       | 1.10-1.38, br m                       |                                     | 8                                    |
| 8    | 44.3, CH              | 1.73, m                               | 9                                   |                                      |
| 9    | 132.9, CH             | 5.01, dd (8.9, 15.2)                  | 8, 10                               | 8                                    |
| 10   | 132.4, CH             | 5.34, m                               | 9, 11                               | 8                                    |
| 11   | 25.6, CH <sub>2</sub> | 1.97, m                               | 10, 12                              | 9, 10, 12                            |
| 12   | 14.2, CH <sub>3</sub> | 0.94, t (7.5)                         | 11                                  | 10, 11                               |
| 13   | 18.5, CH <sub>2</sub> | 2.28, m                               | 14                                  | 1, 2, 3, 14                          |
| 14   | 12.0, CH <sub>3</sub> | 1.15, t (7.5)                         | 13                                  | 2, 13                                |
| 15   | 29.9, CH <sub>2</sub> | 1.70, m                               | 16                                  | 3, 4, 5, 16                          |
| 15   | 29.9, CH <sub>2</sub> | 1.70, m                               | 16                                  | 3, 4, 5, 16                          |
| 16   | 7.7, CH <sub>3</sub>  | 0.80, m                               | 15 $\alpha$ , 15 $\beta$            | 4, 5, 15                             |
| 17   | 28.2, CH <sub>2</sub> | 1.10-1.38, br m                       |                                     | 8                                    |
|      |                       | 1.10-1.38, br m                       |                                     | 8                                    |
| 18   | 11.6, CH <sub>3</sub> | 0.80, m                               |                                     | 8                                    |

\* All Assignments are based on COSY, HSQC, and HMBC experiments. <sup>a</sup> Recorded at 125 MHz. Multiplicities were obtained from the Attached Proton Test (APT) experiments. <sup>b</sup> Recorded at 500 MHz.



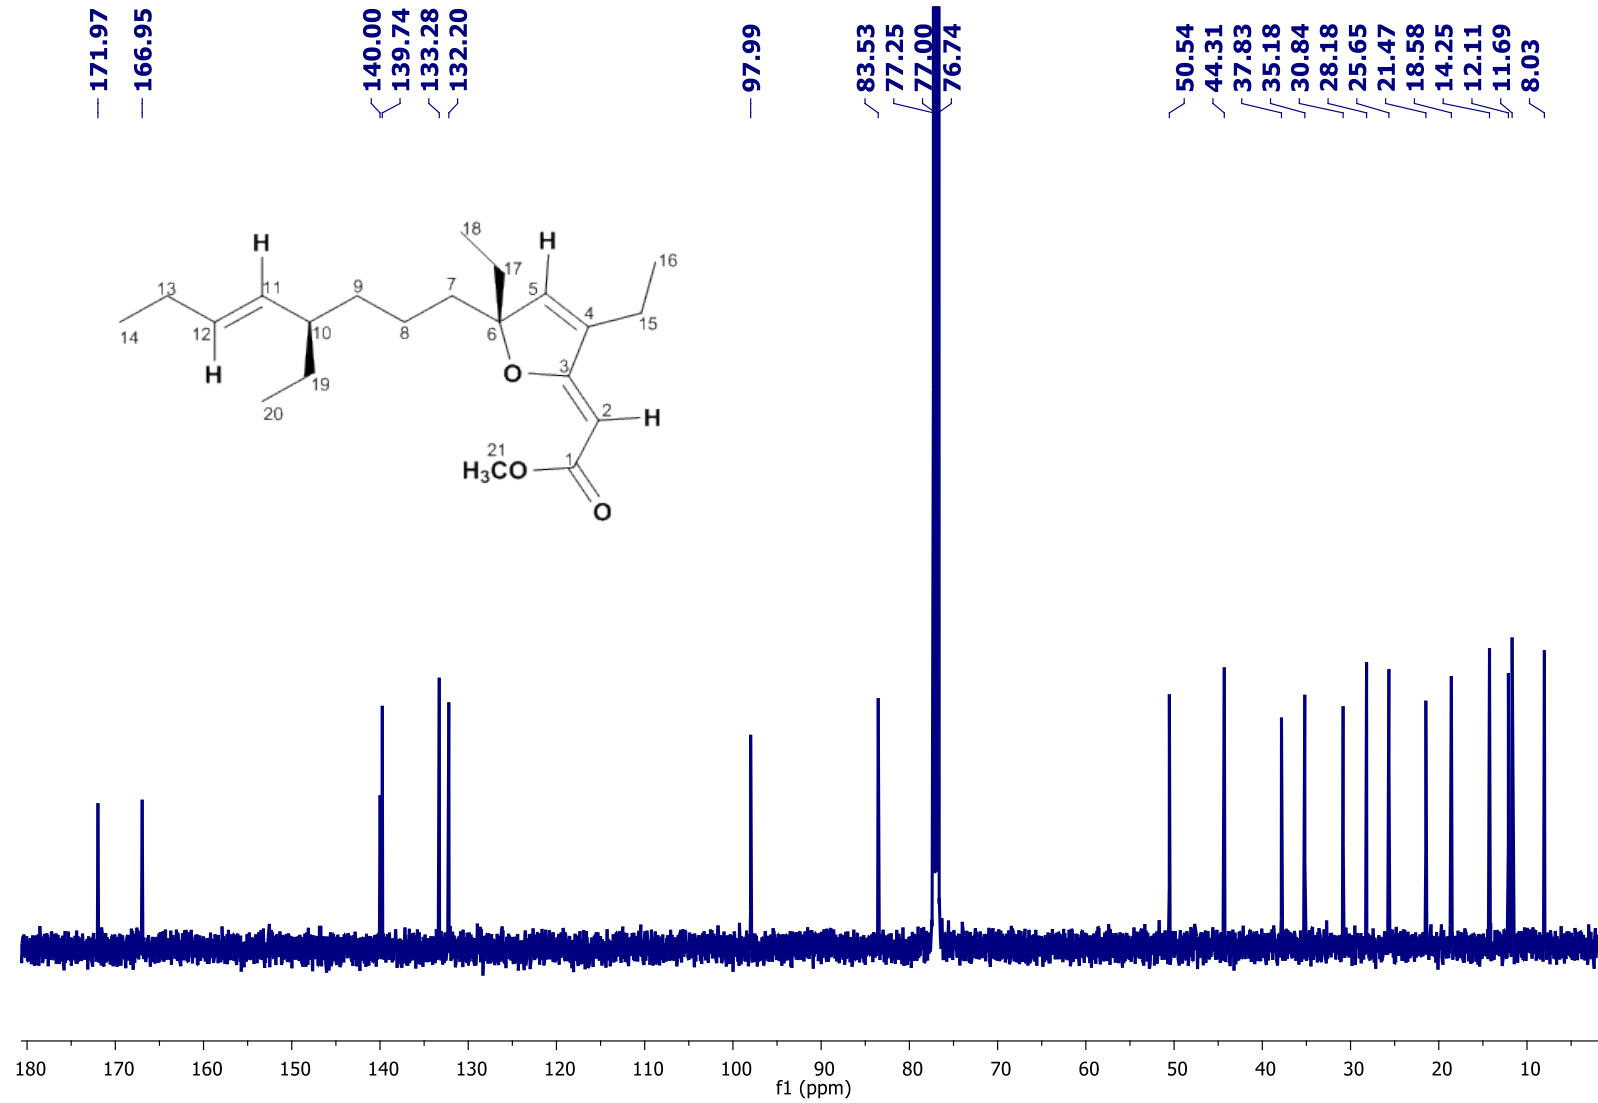

Figure S2. <sup>13</sup>C-NMR spectrum (CDCl<sub>3</sub>, 125 MHz) of gracilioether M (**6**).

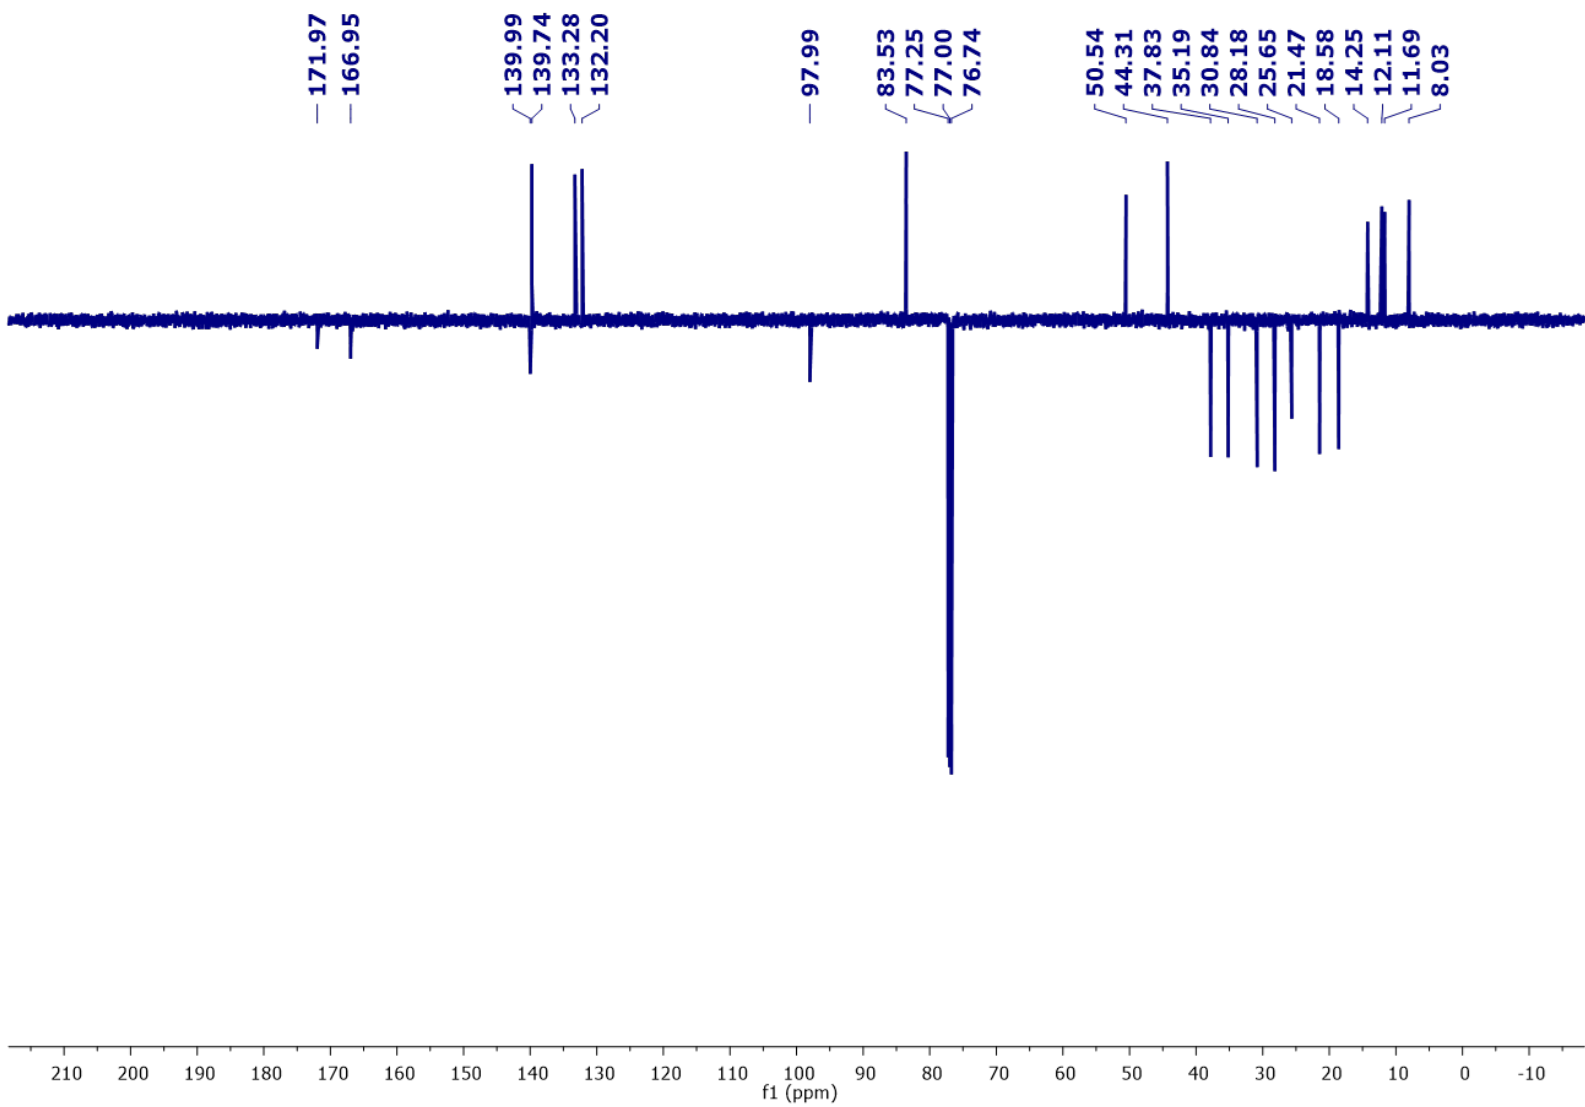

Figure S3. APT spectrum (CDCl<sub>3</sub>, 125 MHz) of gracilioether M (**6**).

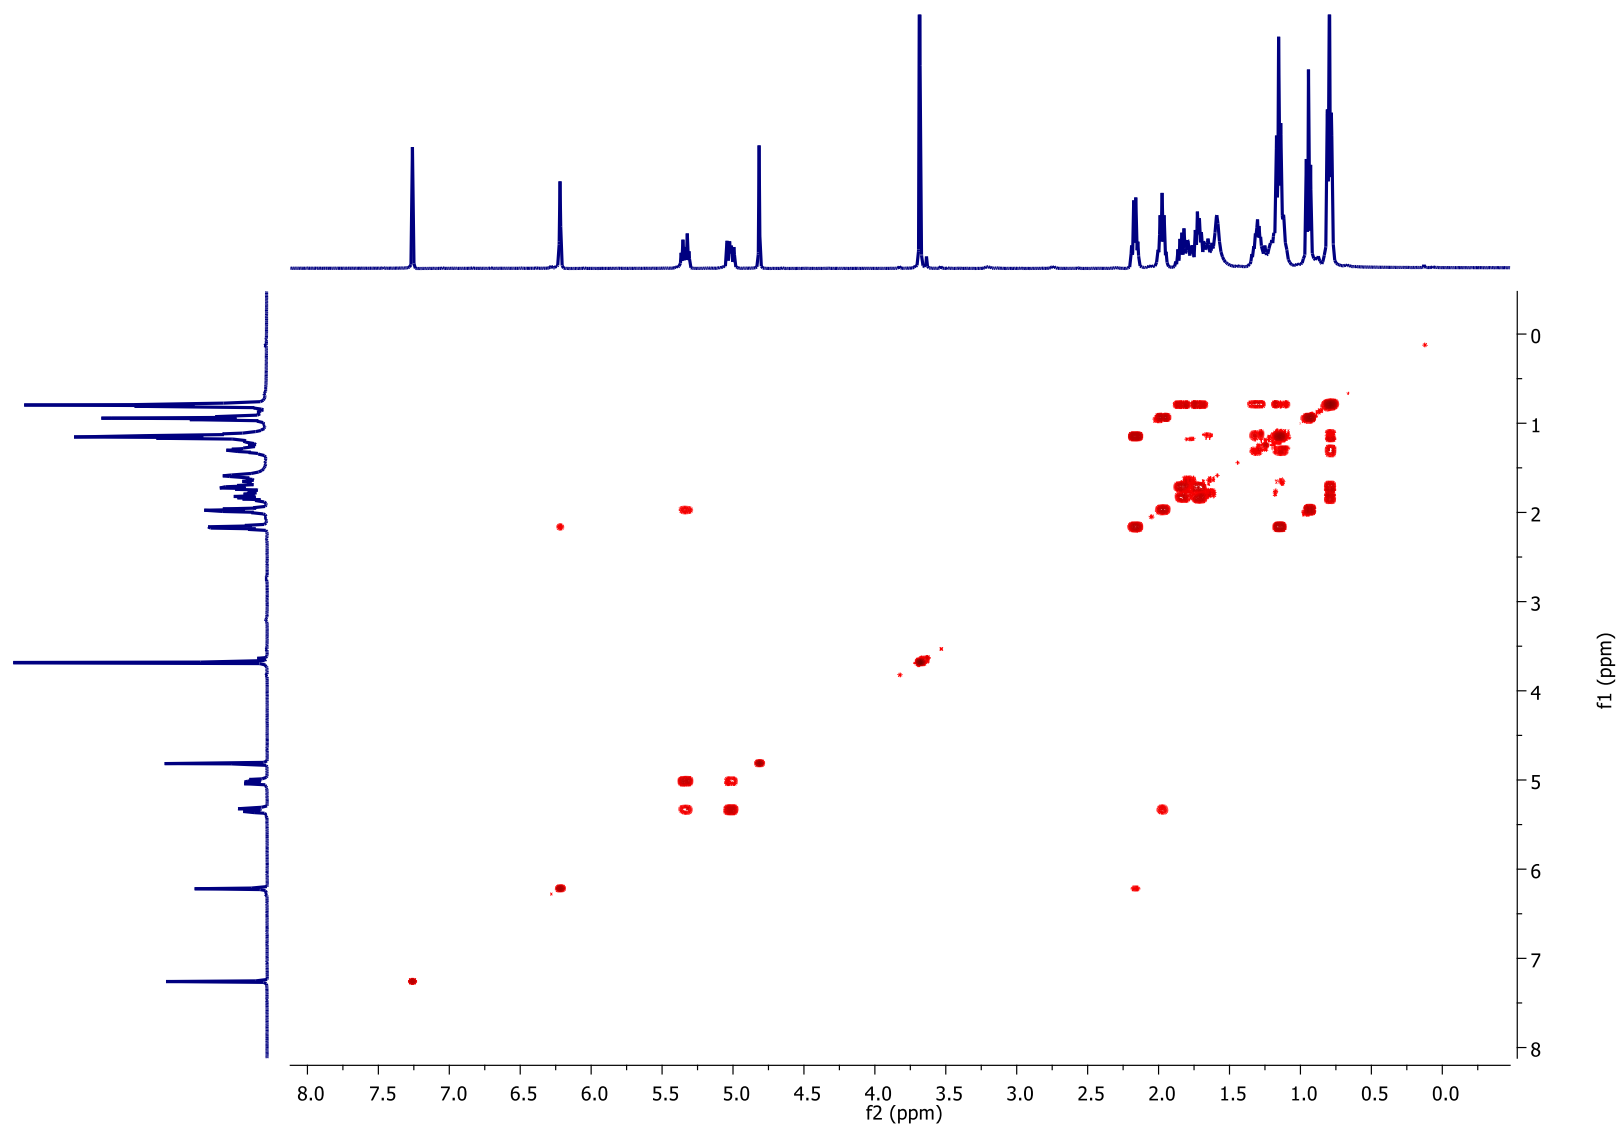

Figure S4.  $^1\text{H}$ - $^1\text{H}$ -COSY spectrum ( $\text{CDCl}_3$ ) of gracilioether M (**6**).

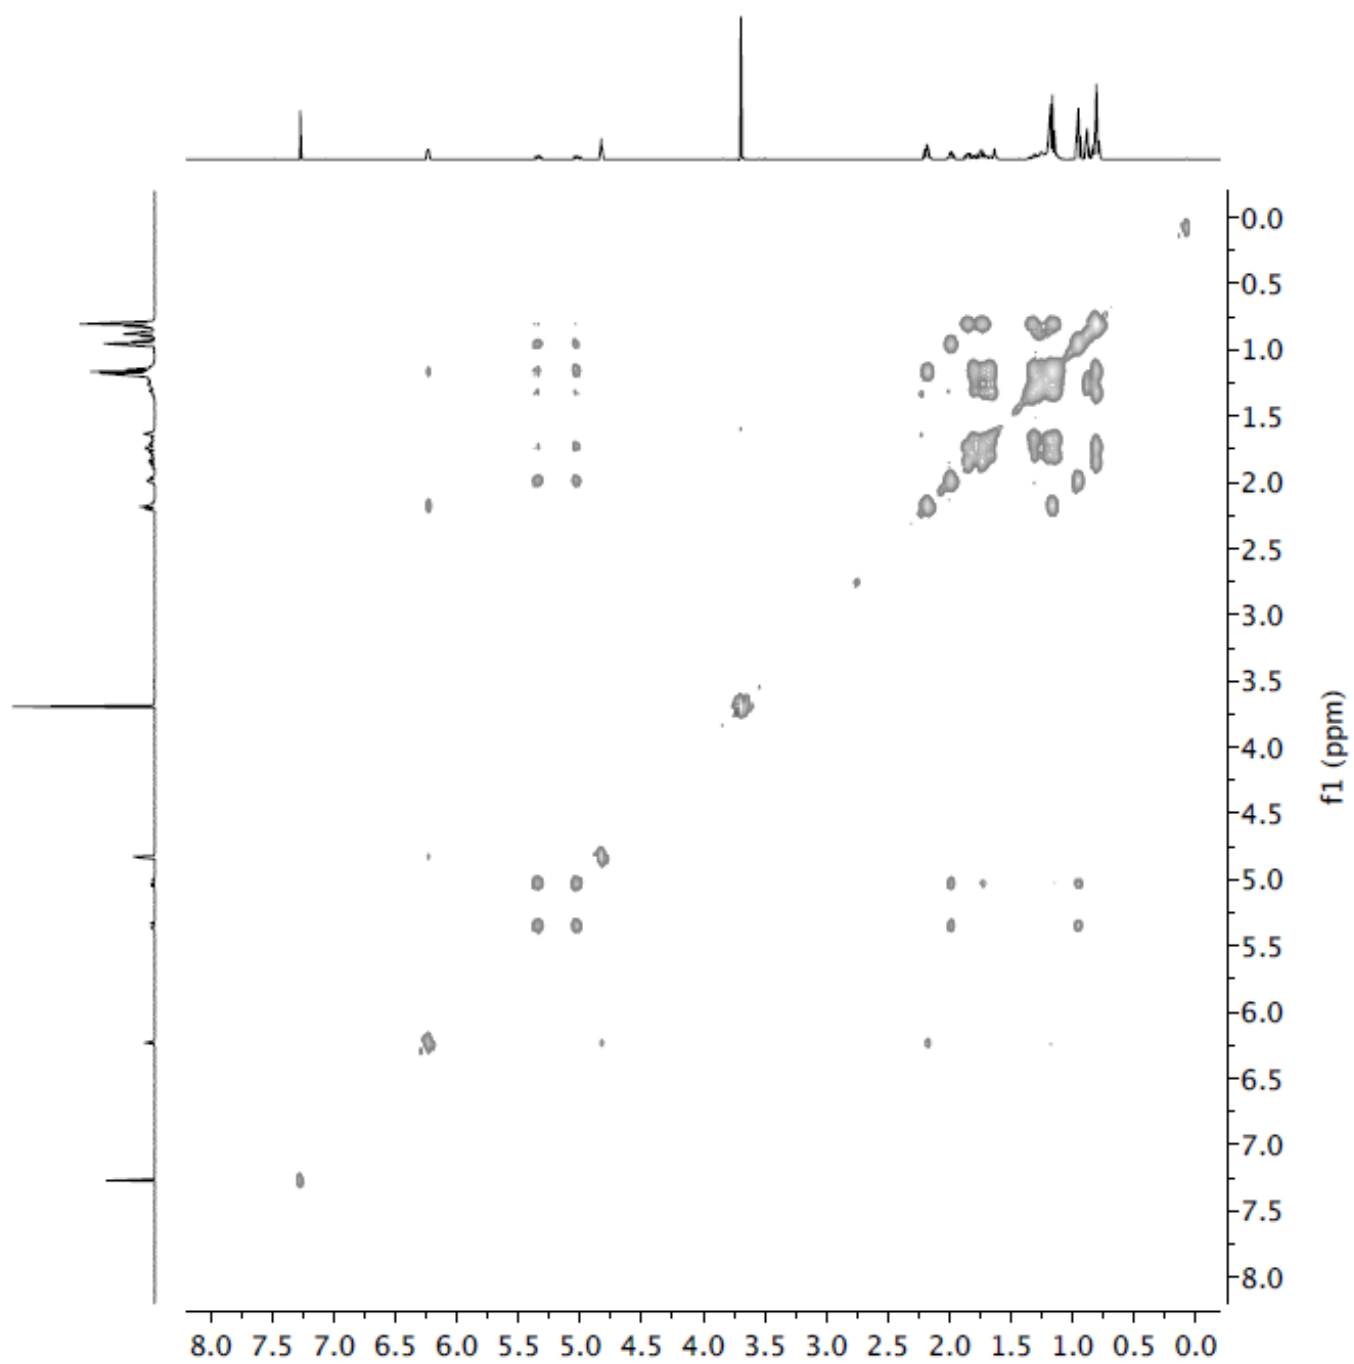

Figure S5.  $^1\text{H}$ - $^1\text{H}$ -TOCSY spectrum ( $\text{CDCl}_3$ ) of gracilioether M (**6**)

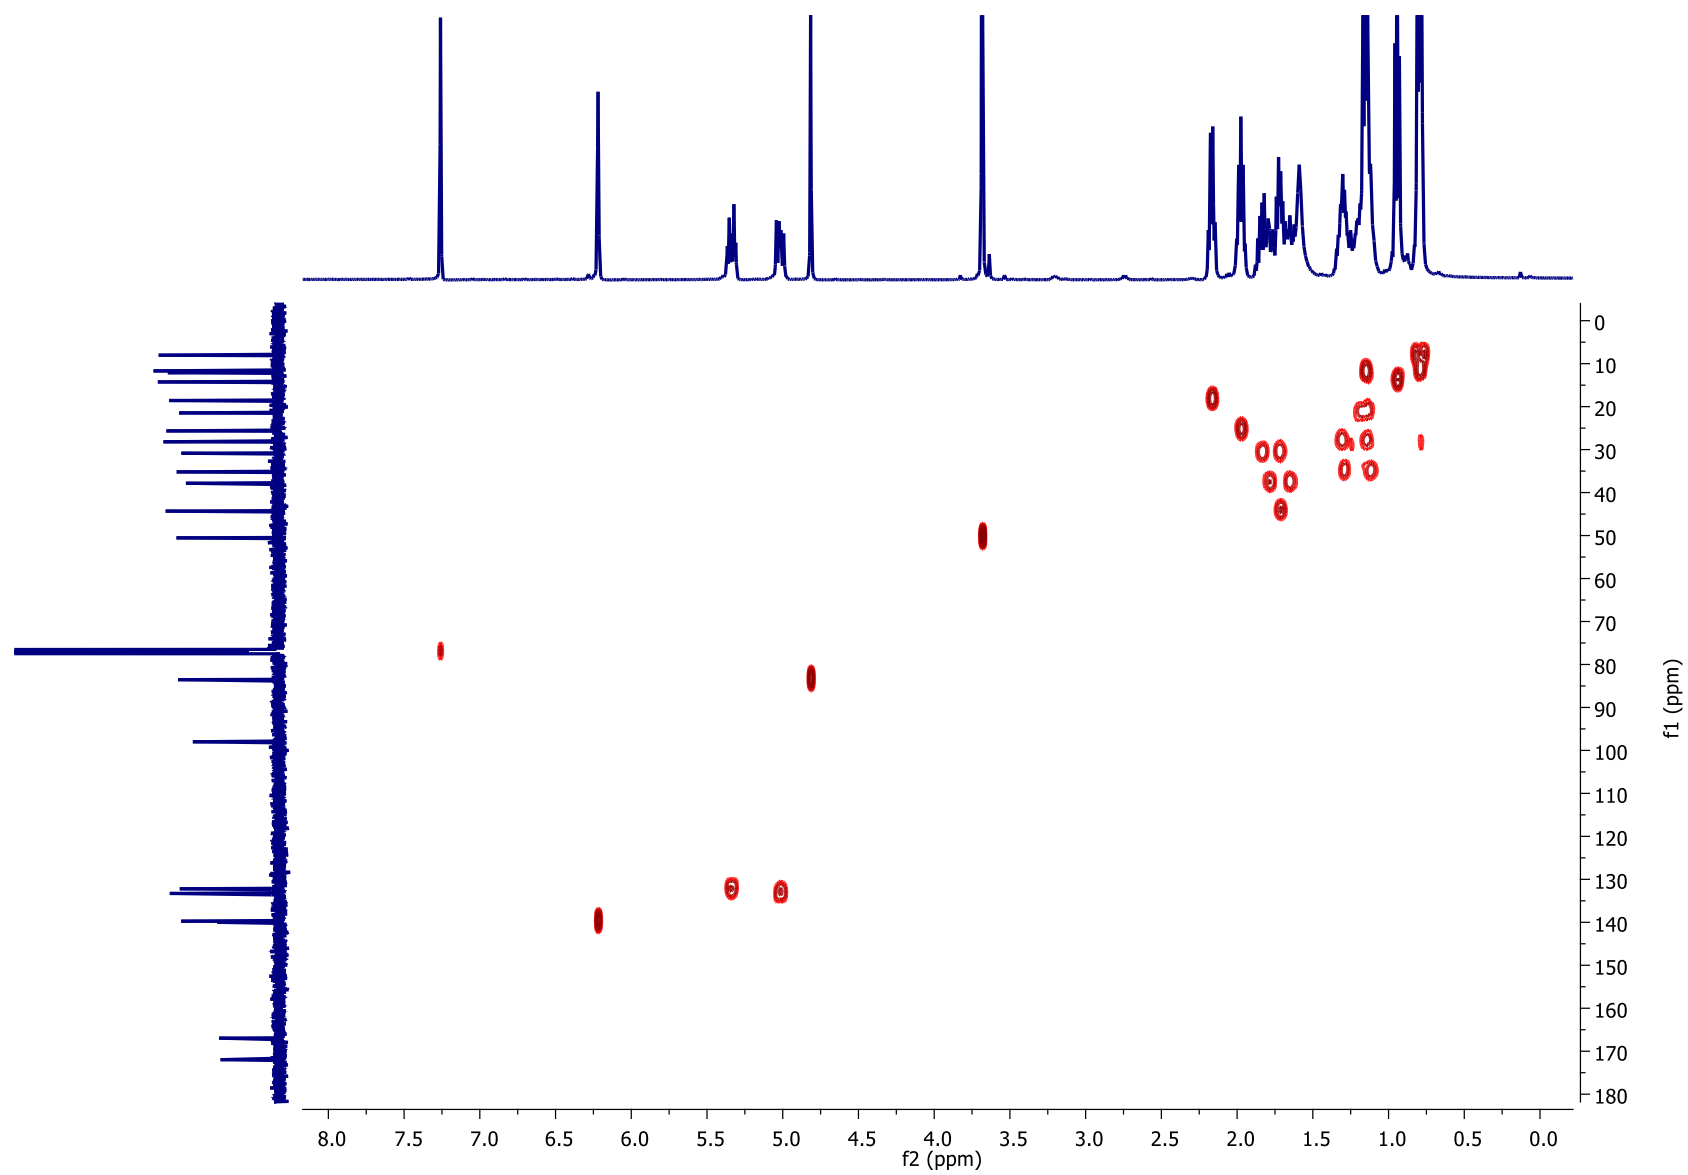

Figure S6.  $^1\text{H}$ - $^{13}\text{C}$ -HSQC spectrum ( $\text{CDCl}_3$ ) of gracilioether M (6).

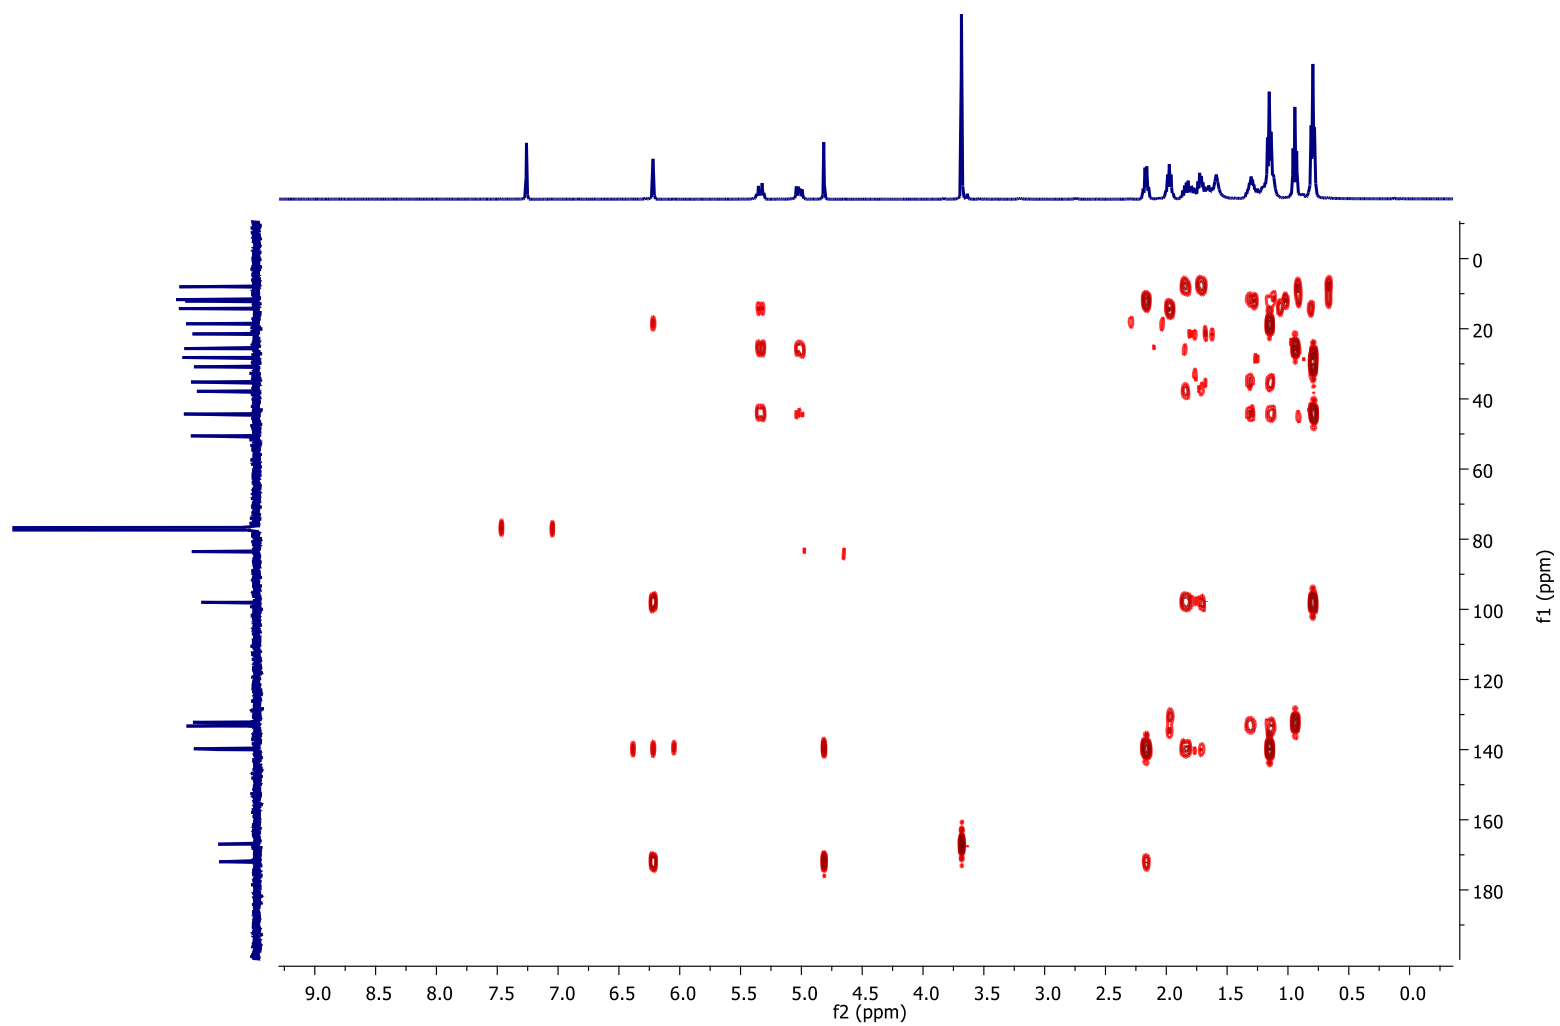

Figure S7.  $^1\text{H}$ - $^{13}\text{C}$ -HMBC spectrum ( $\text{CDCl}_3$ ) of gracilioether M (6).



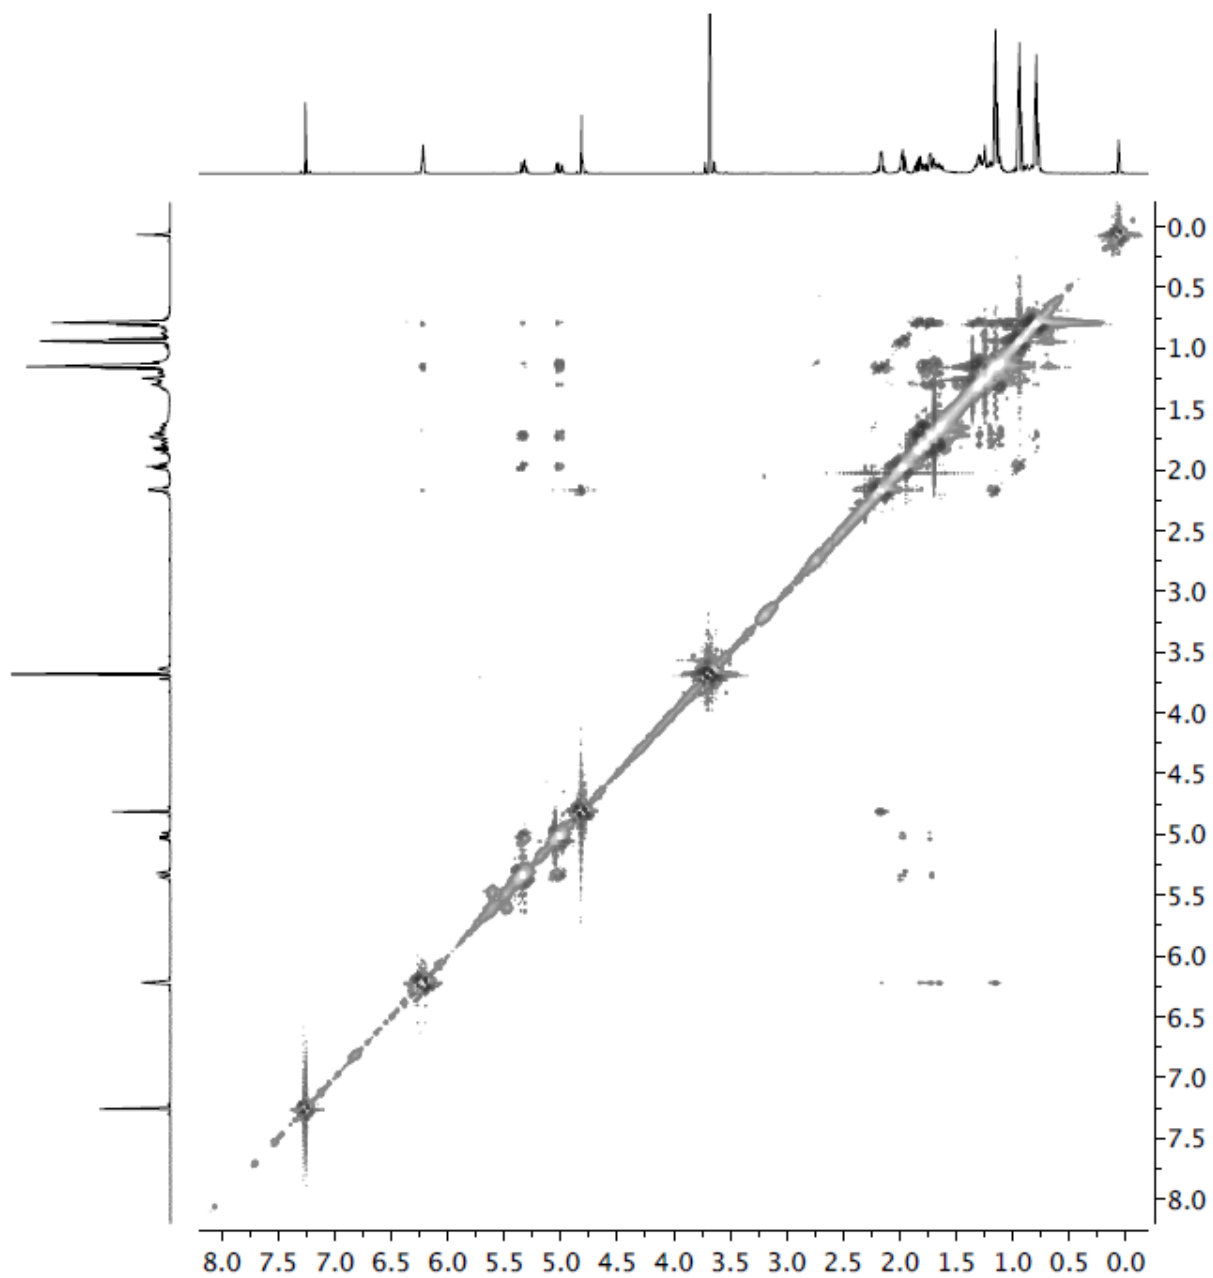

Figure S8.  $^1\text{H}$ - $^1\text{H}$ -NOESY spectrum ( $\text{CDCl}_3$ ) of gracilioether M (**6**).

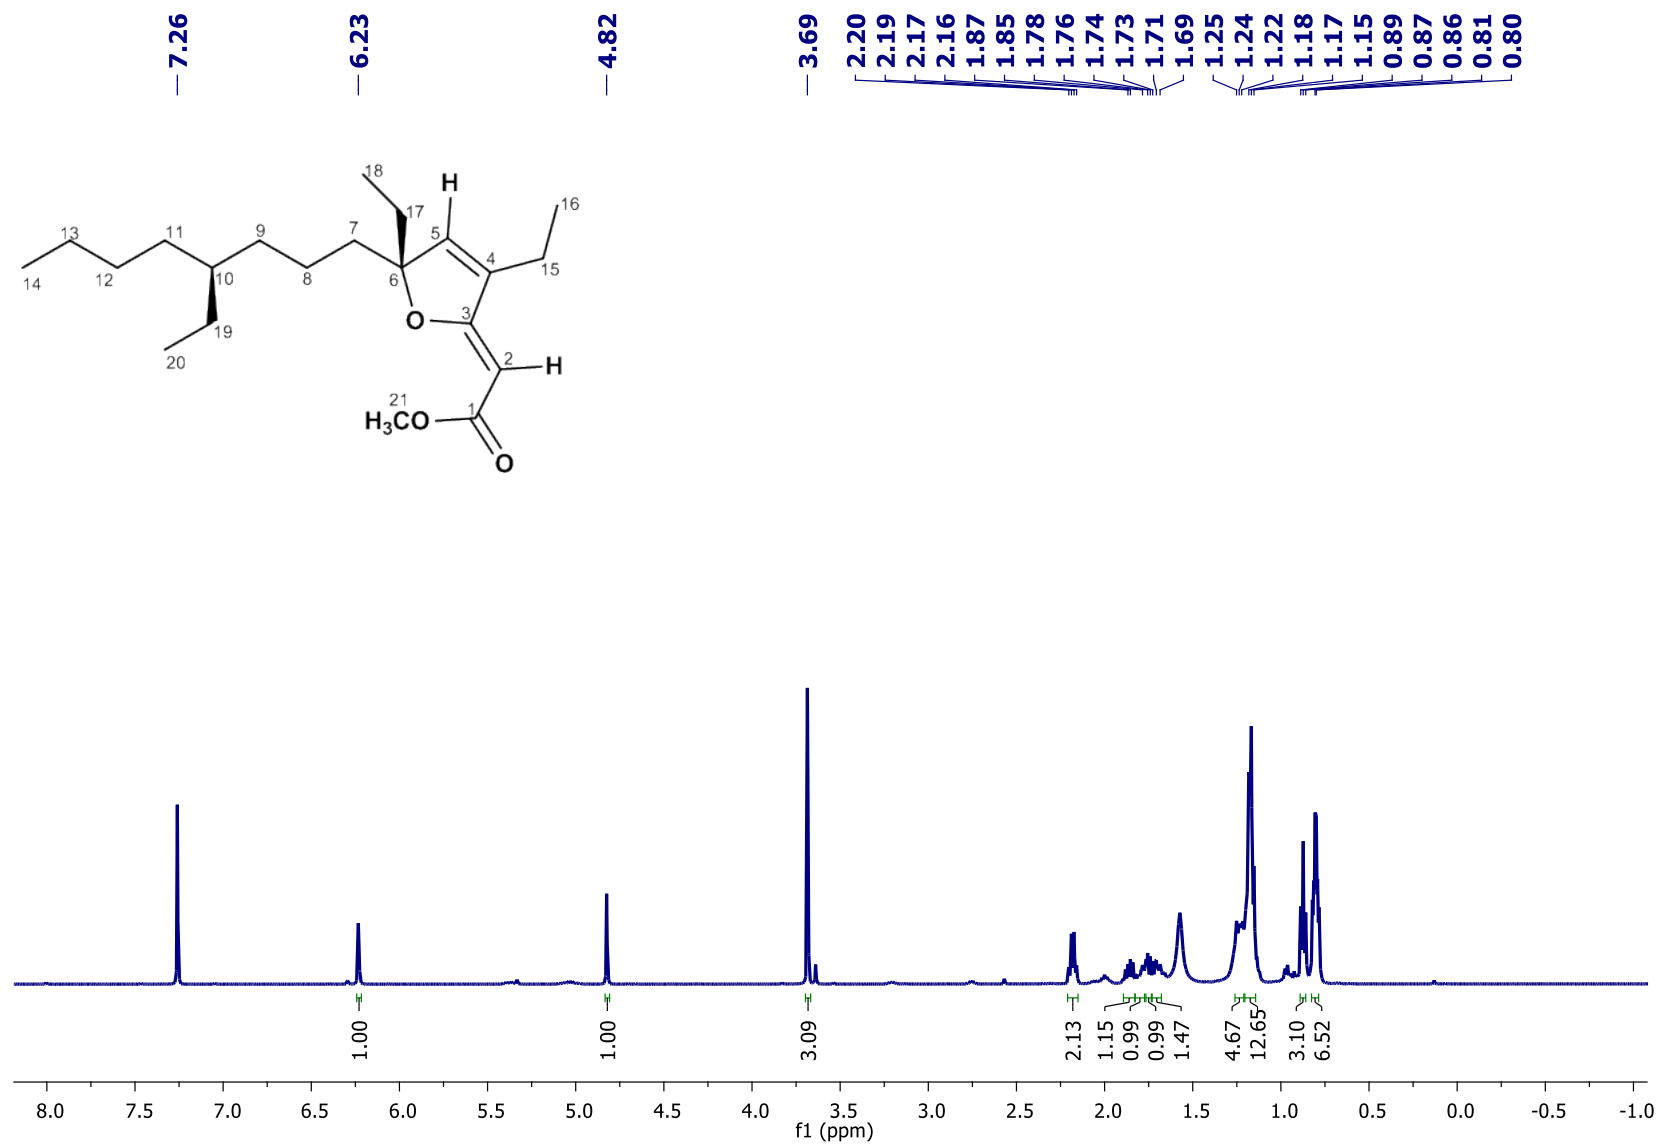

Figure S9.  $^1\text{H}$ -NMR spectrum ( $\text{CDCl}_3$ , 500 MHz) of 11,12-dihydrogracilioether M (7).

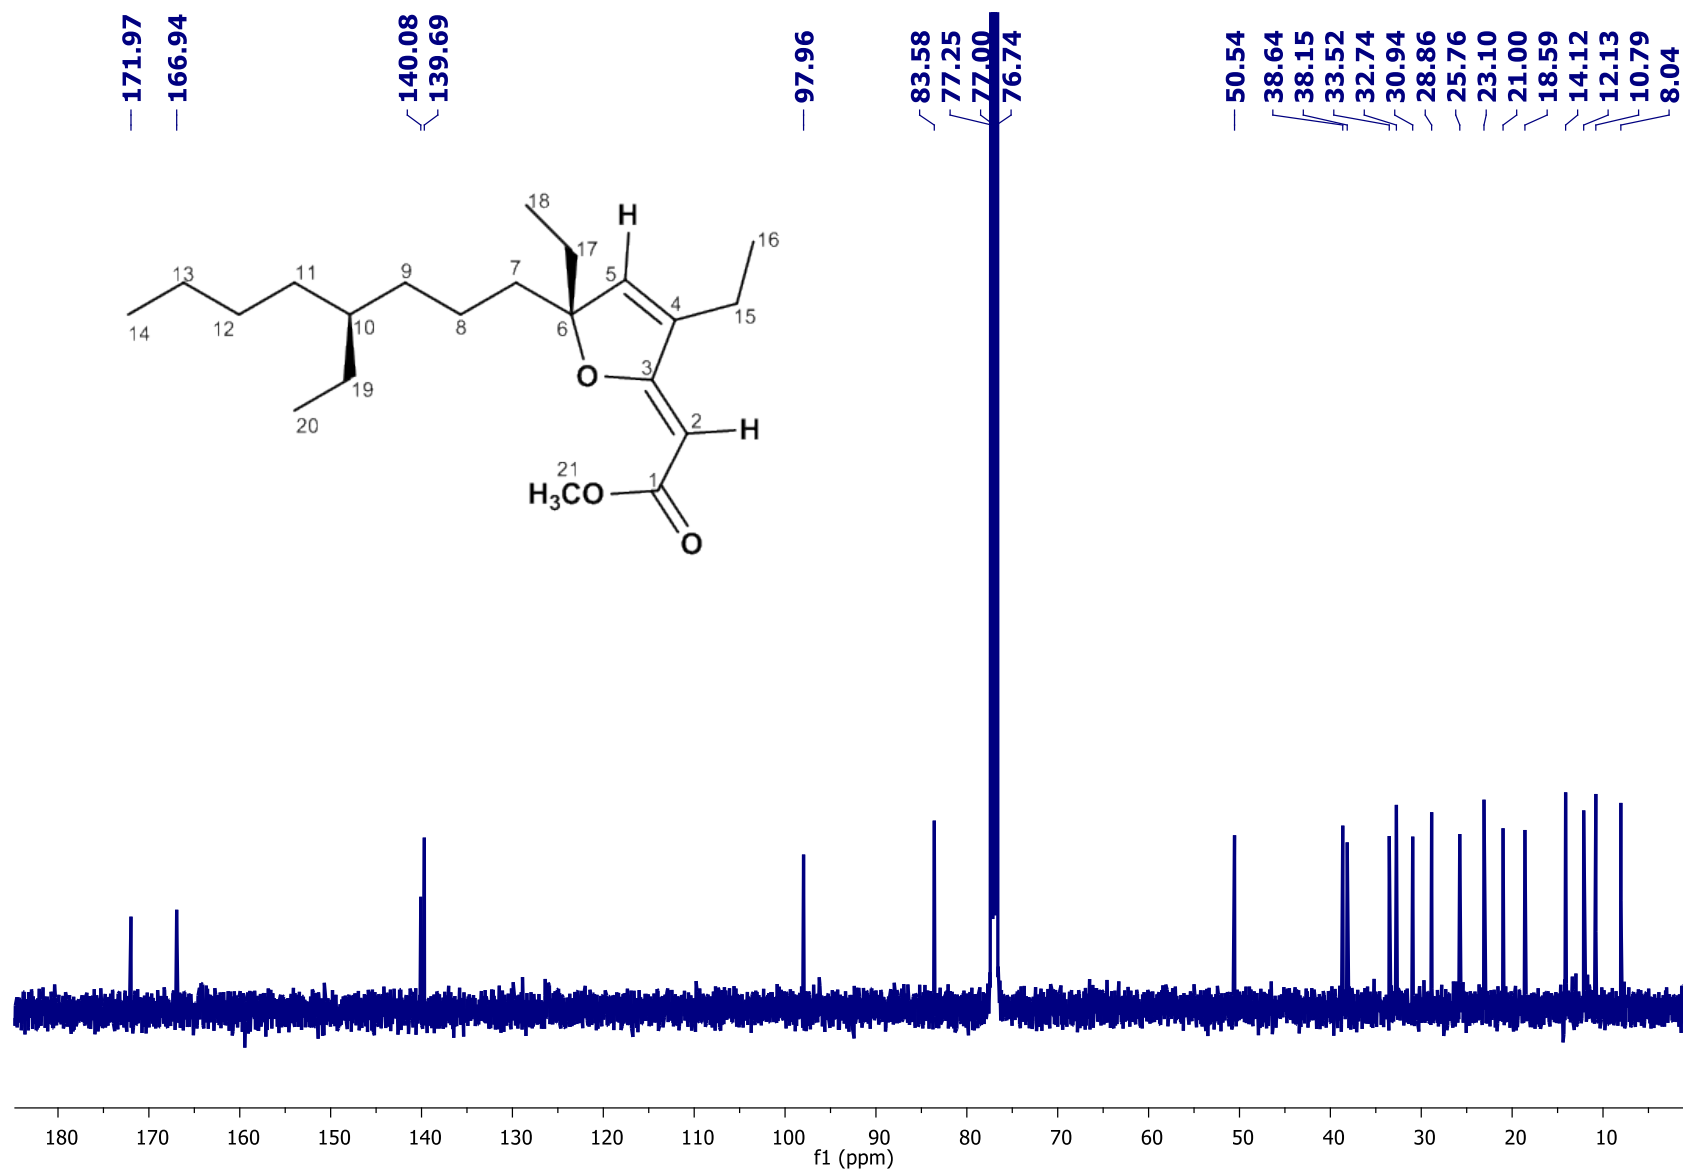

Figure S10. <sup>13</sup>C-NMR spectrum (CDCl<sub>3</sub>, 125 MHz) of 11,12-dihydrogracilioether M (7).

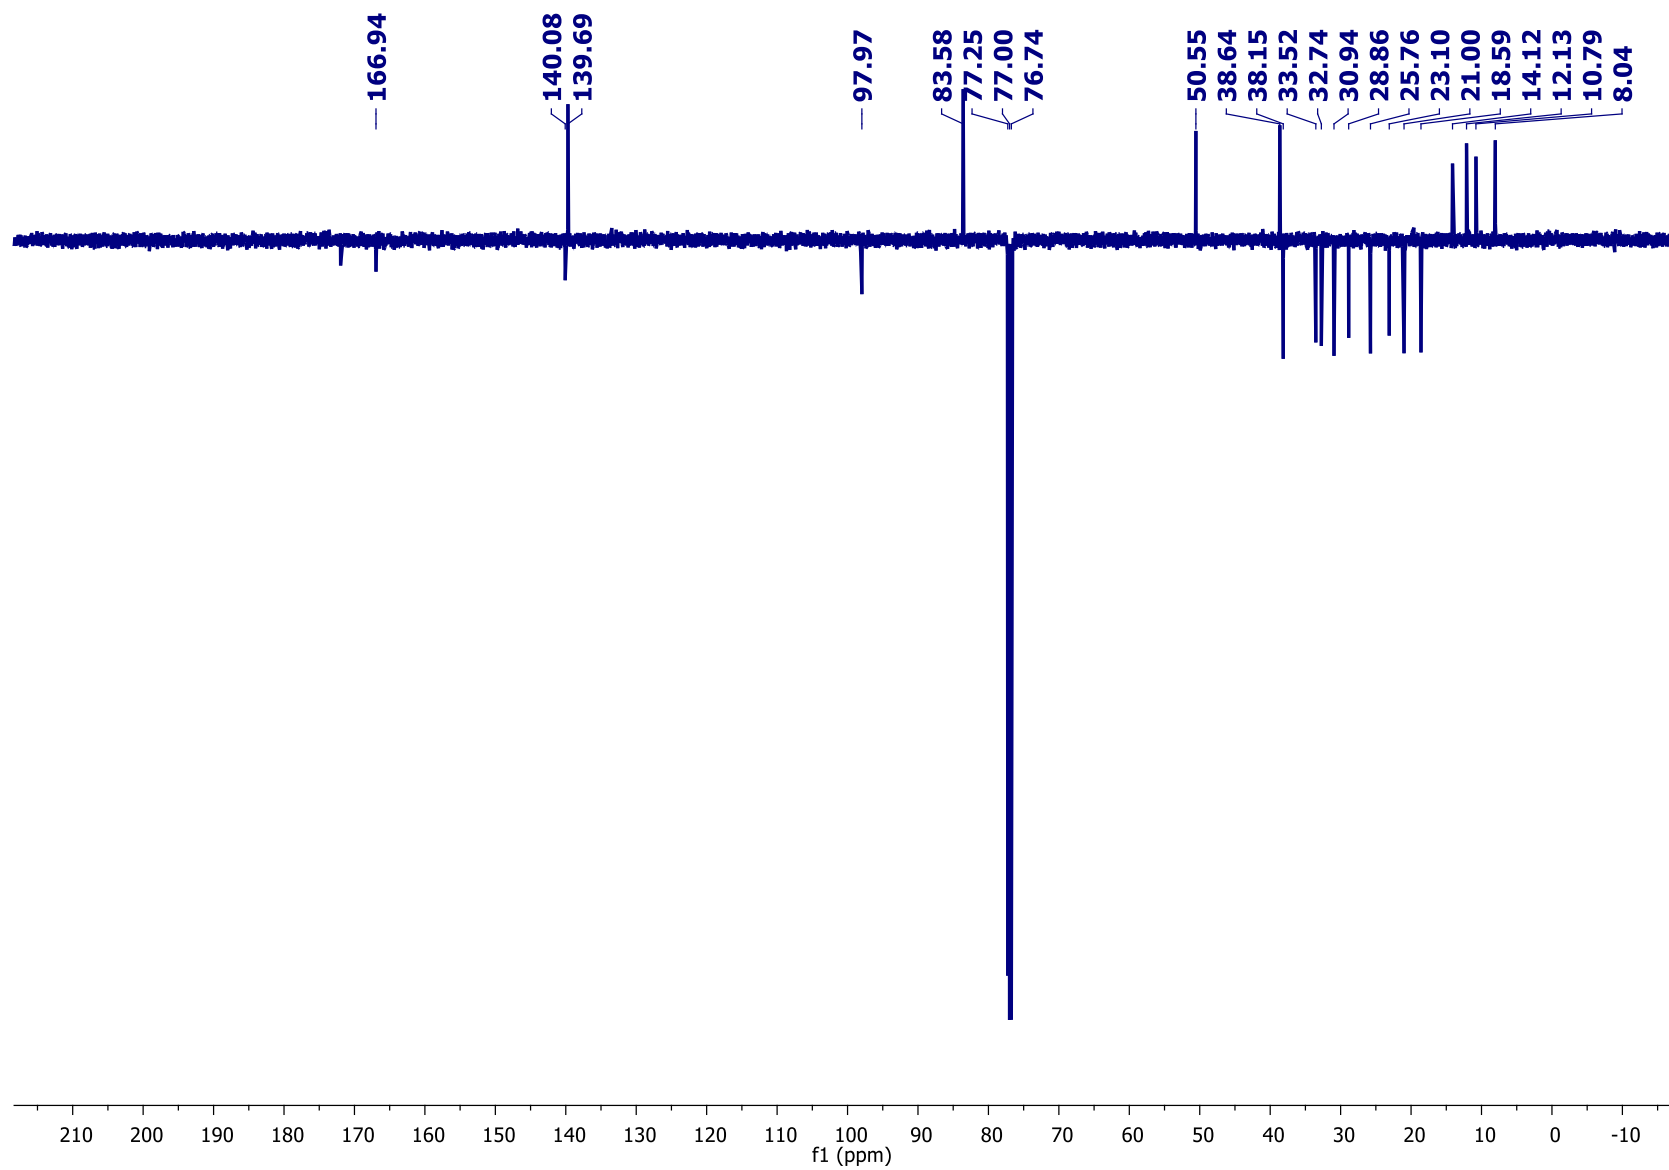

Figure S11. APT spectrum (CDCl<sub>3</sub>, 125 MHz) of 11,12-dihydrogracilioether M (7).

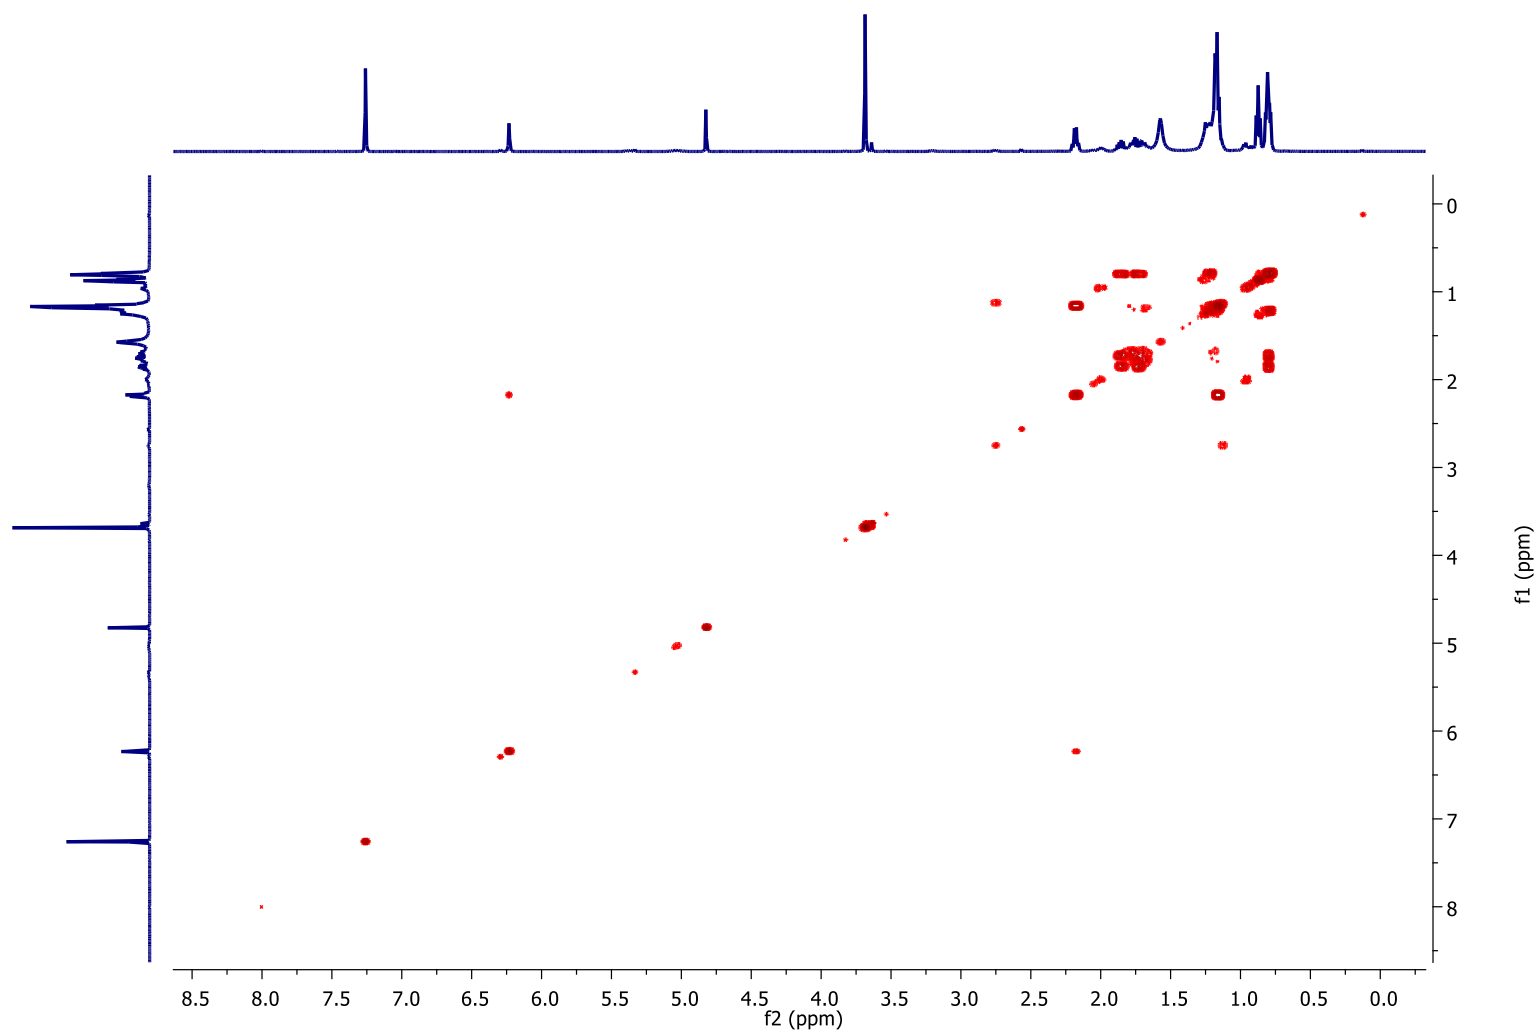

Figure S12.  $^1\text{H}$ - $^1\text{H}$ -COSY spectrum ( $\text{CDCl}_3$ ) of 11,12-dihydrogracilioether M (7).

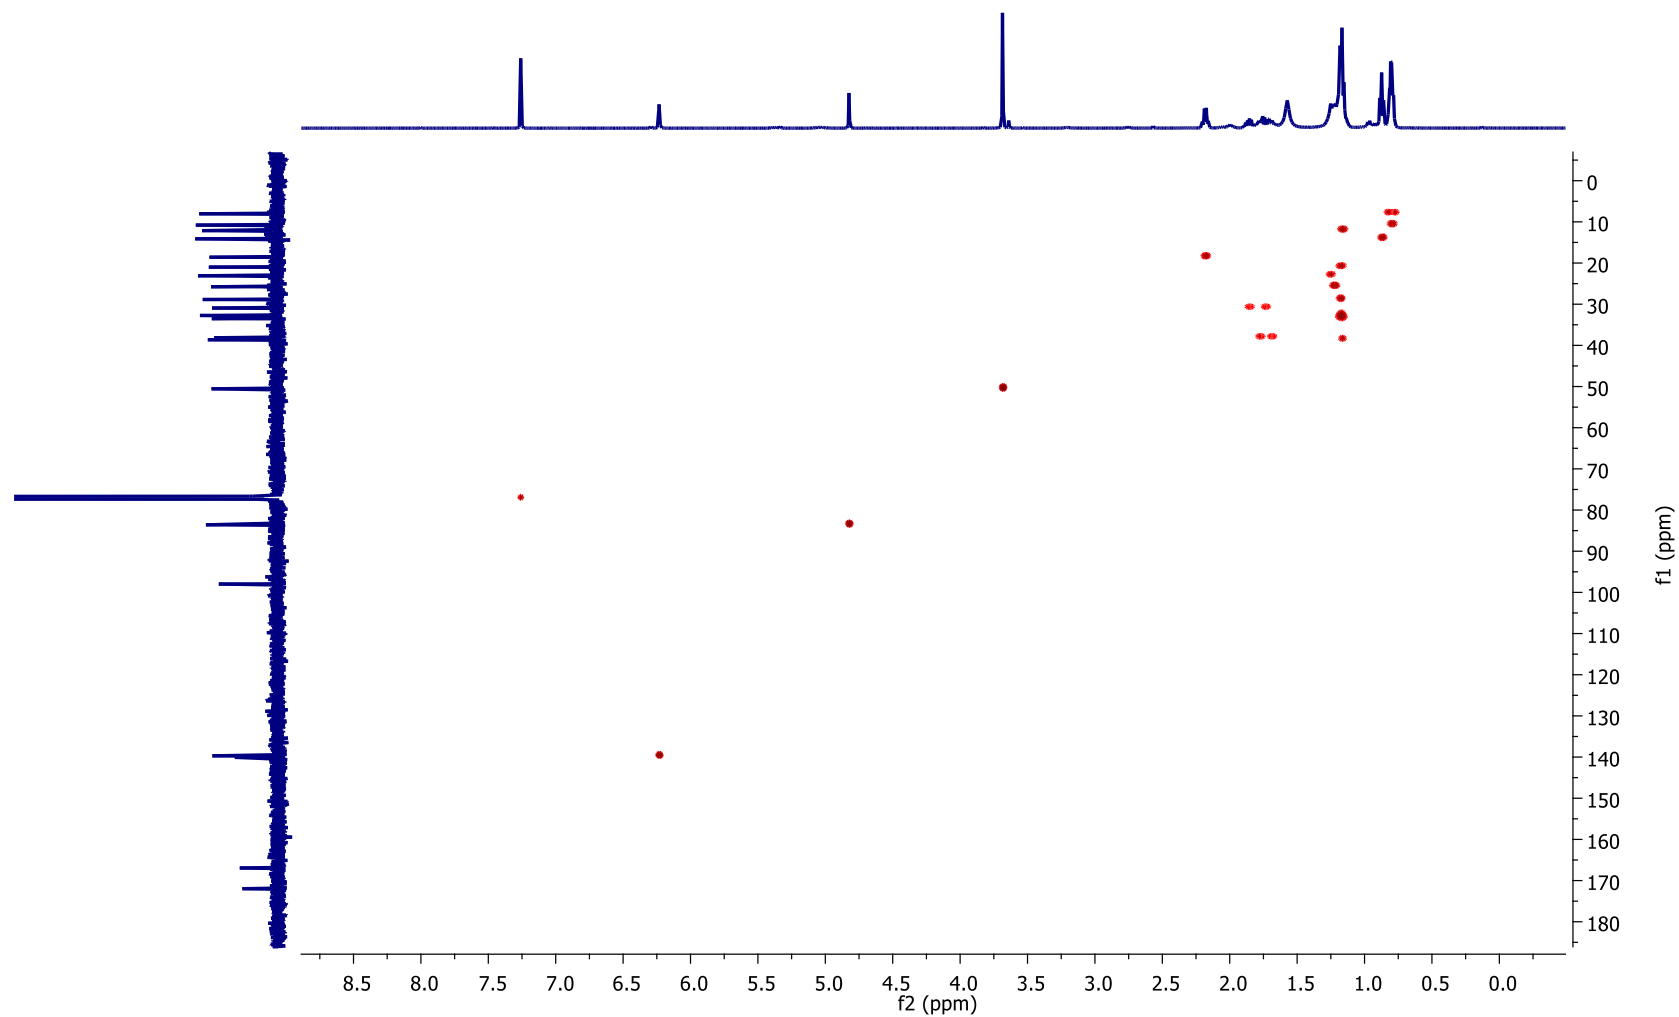

Figure S13.  $^1\text{H}$ - $^{13}\text{C}$ -HSQC spectrum ( $\text{CDCl}_3$ ) of 11,12-dihydrogracilioether M (7).

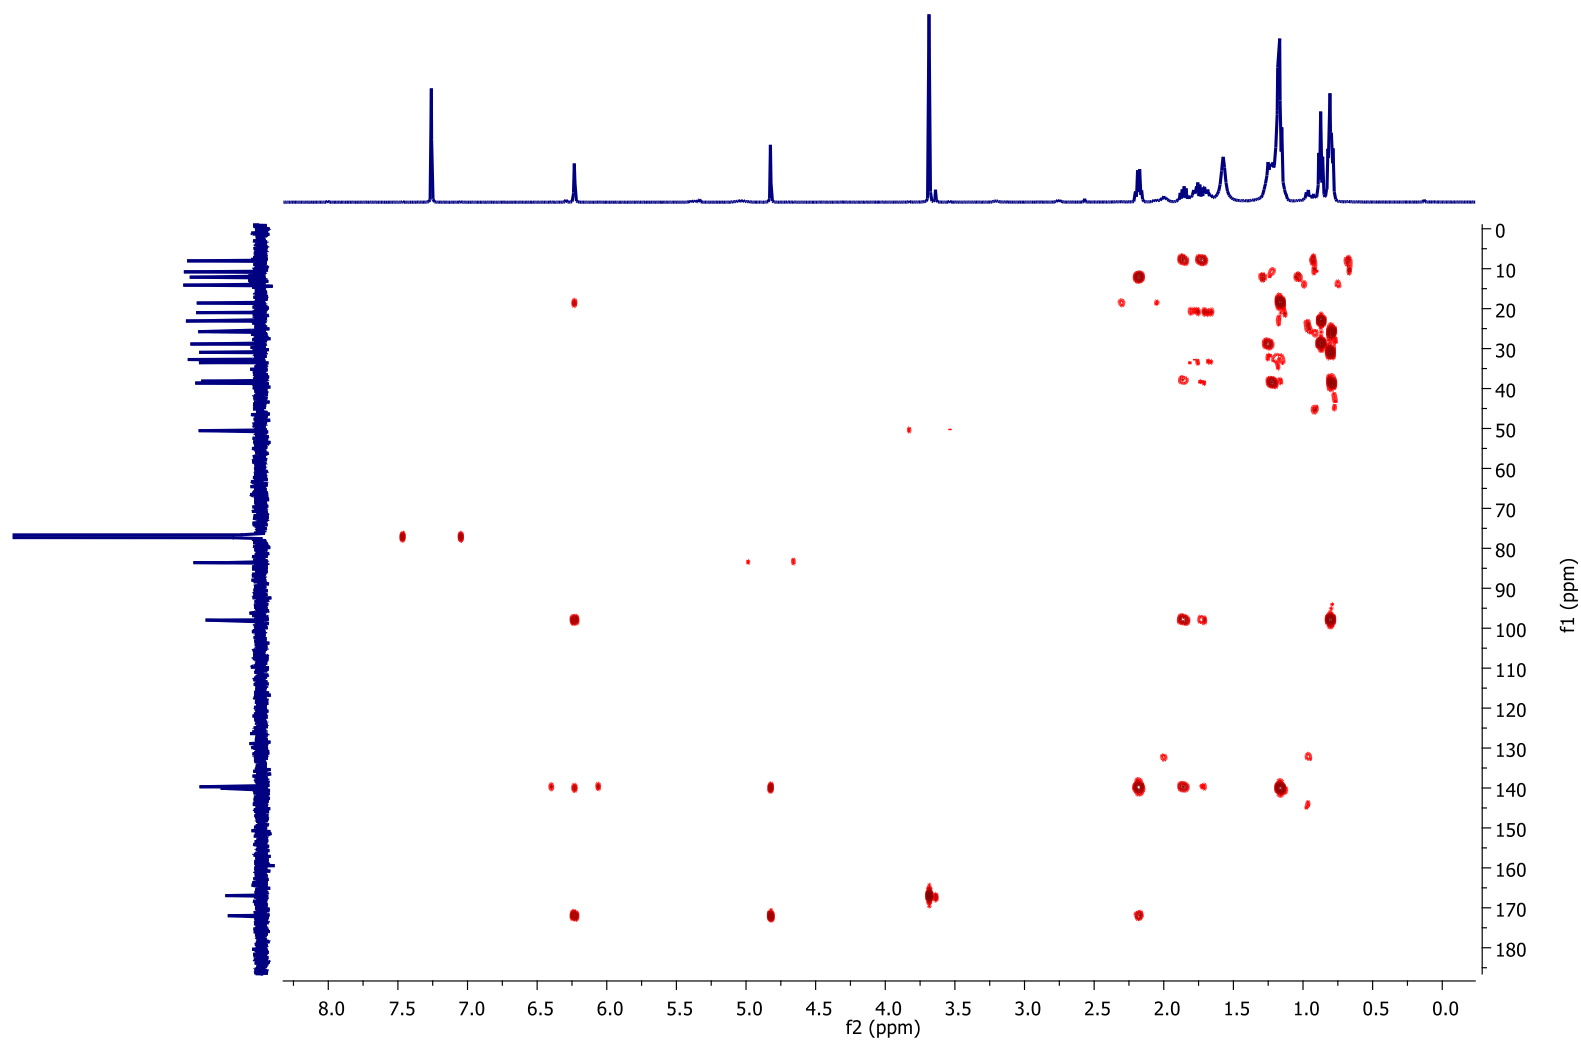

Figure S14.  $^1\text{H}$ - $^{13}\text{C}$ -HMBC spectrum ( $\text{CDCl}_3$ ) of 11,12-dihydrogracilioether M (7).

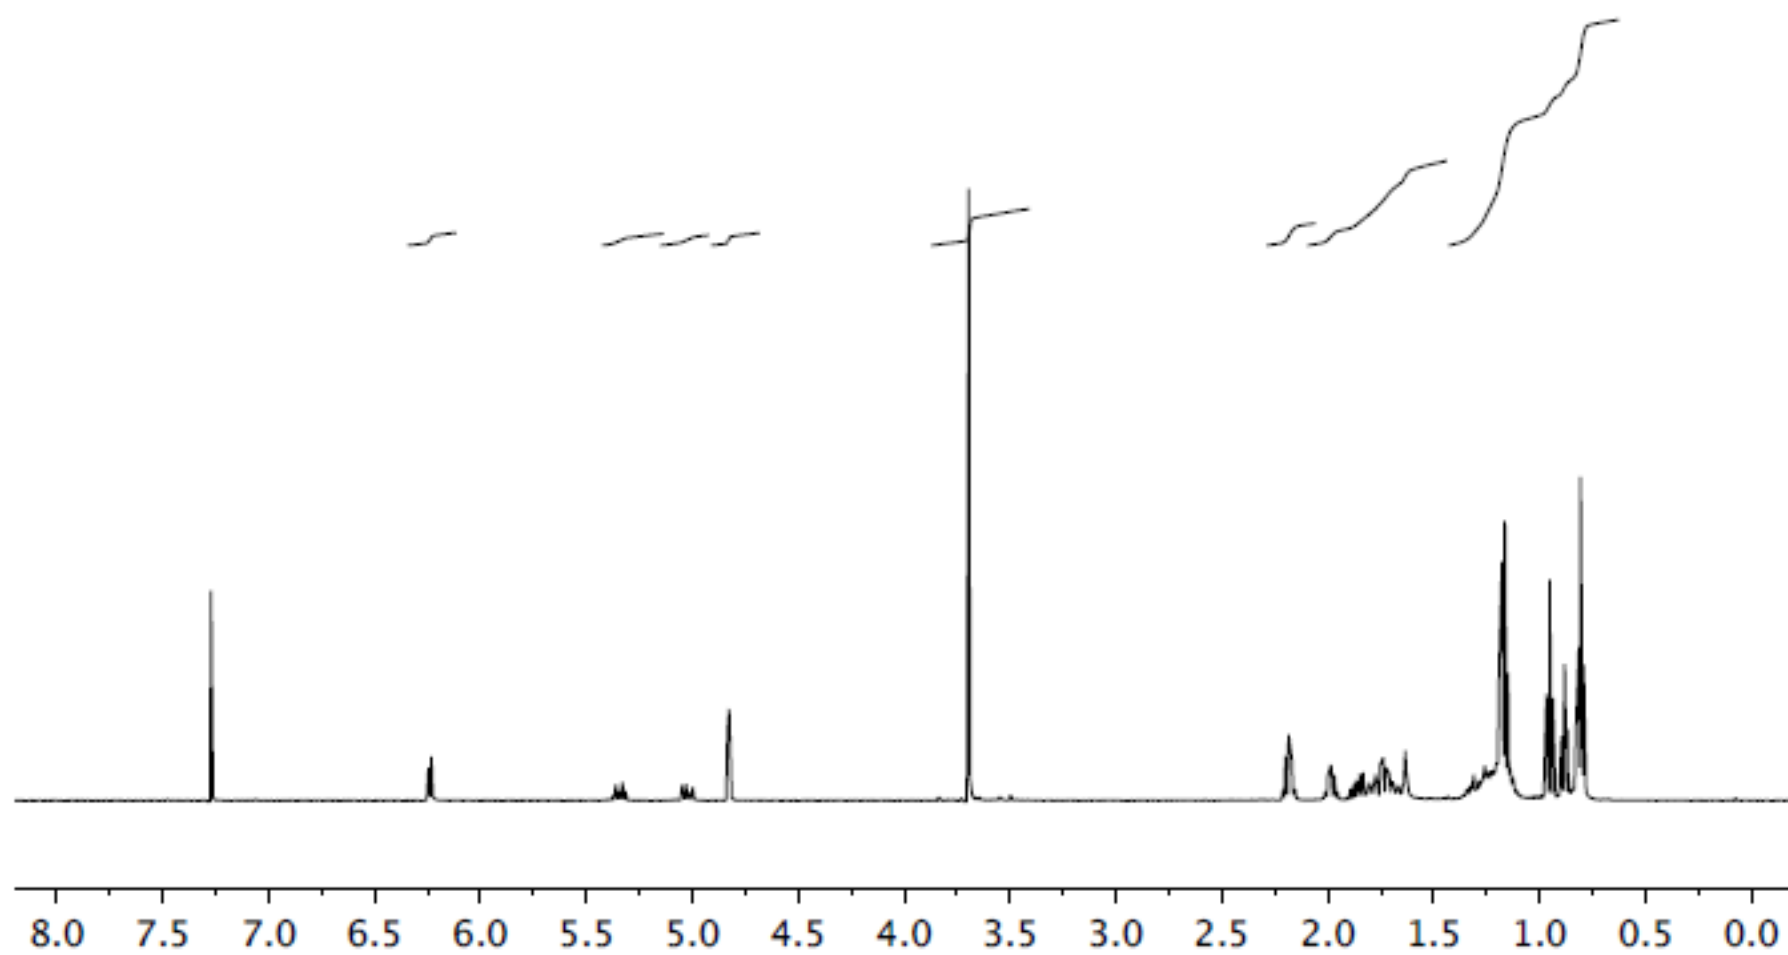

Figure S15.  $^1\text{H}$ -NMR spectrum ( $\text{CDCl}_3$ , 500 MHz) of a mixture of compounds **8–9**.



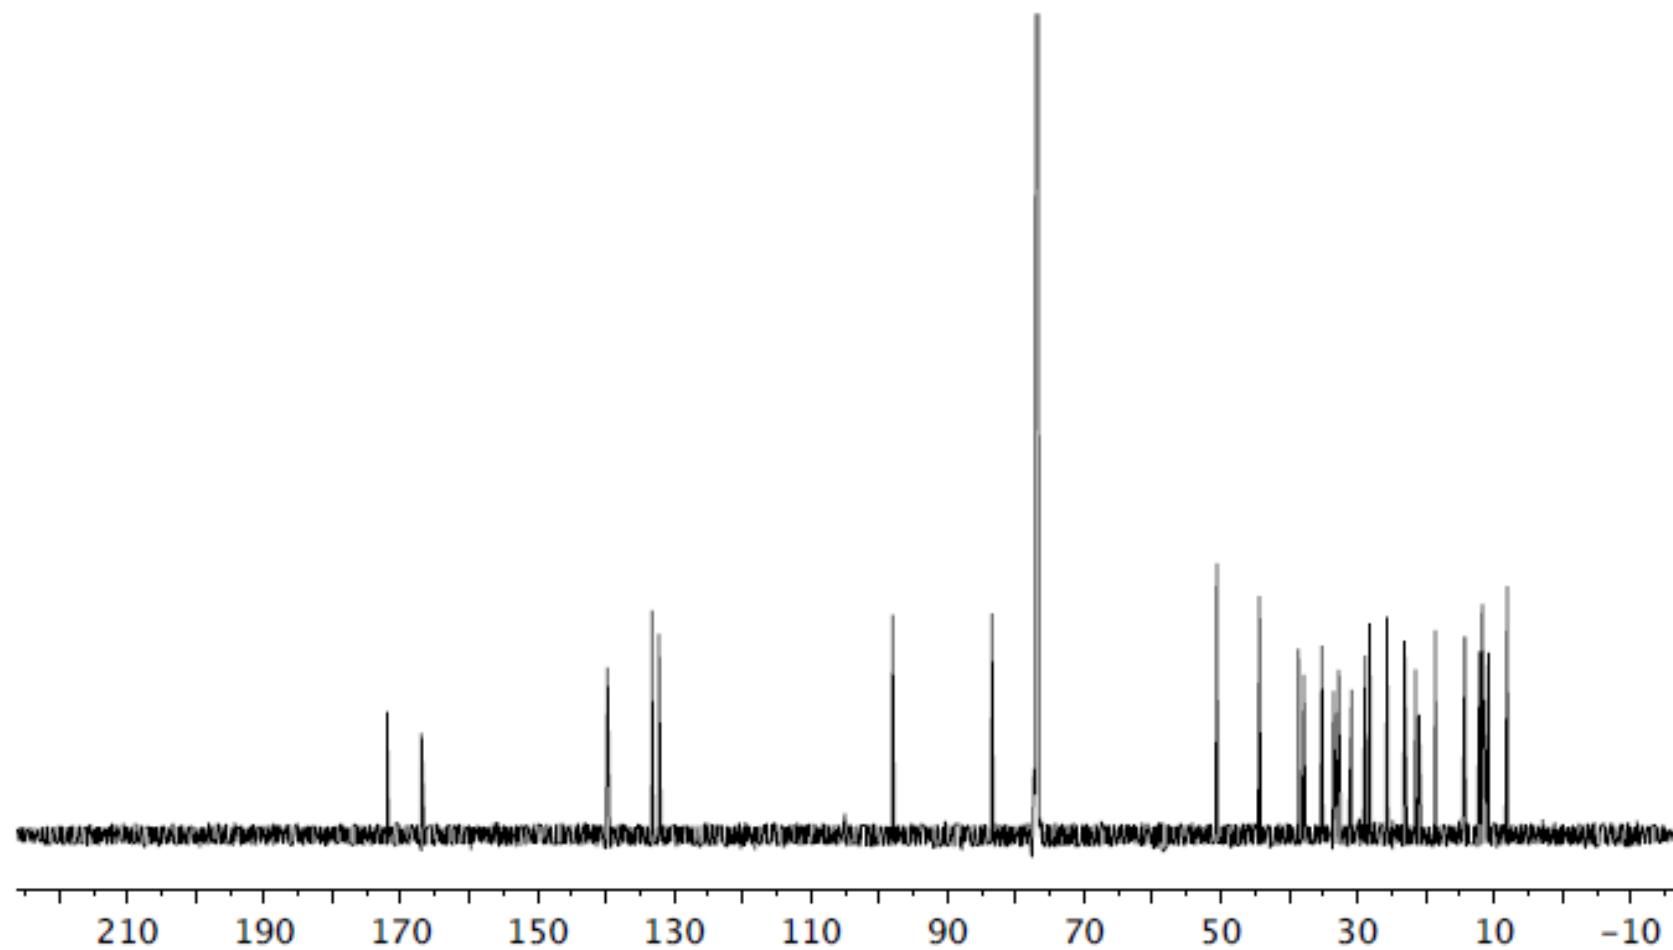

Figure S16.  $^{13}\text{C}$ -NMR spectrum ( $\text{CDCl}_3$ , 125 MHz) of a mixture of compounds **8–9**.

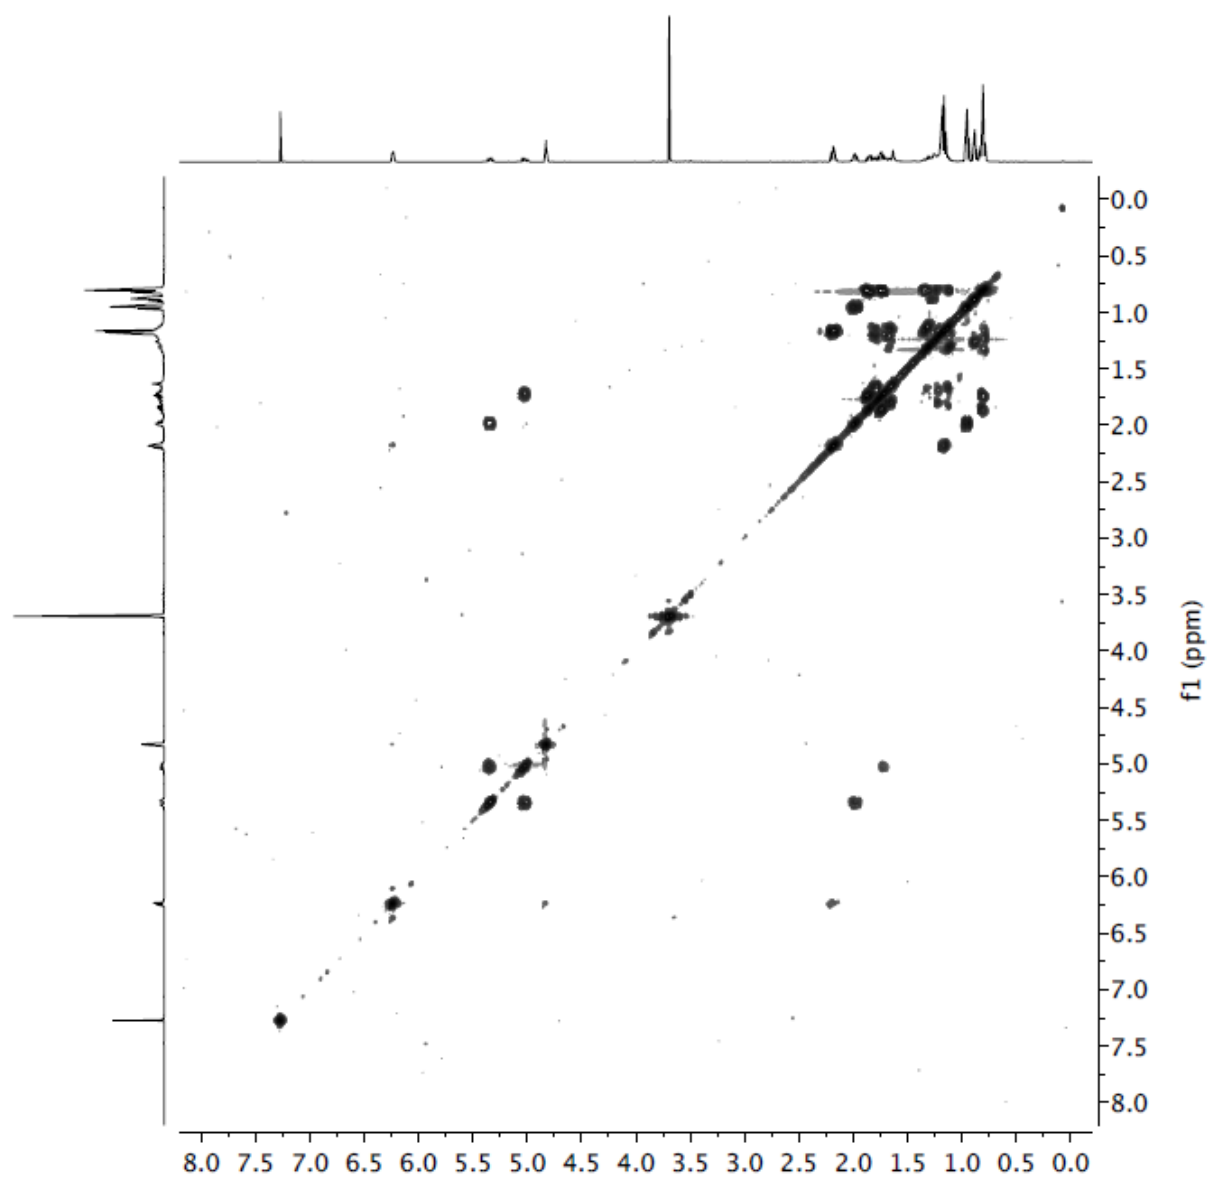

Figure S17.  $^1\text{H}$ - $^1\text{H}$ -COSY spectrum ( $\text{CDCl}_3$ ) of a mixture of compounds **8–9**.

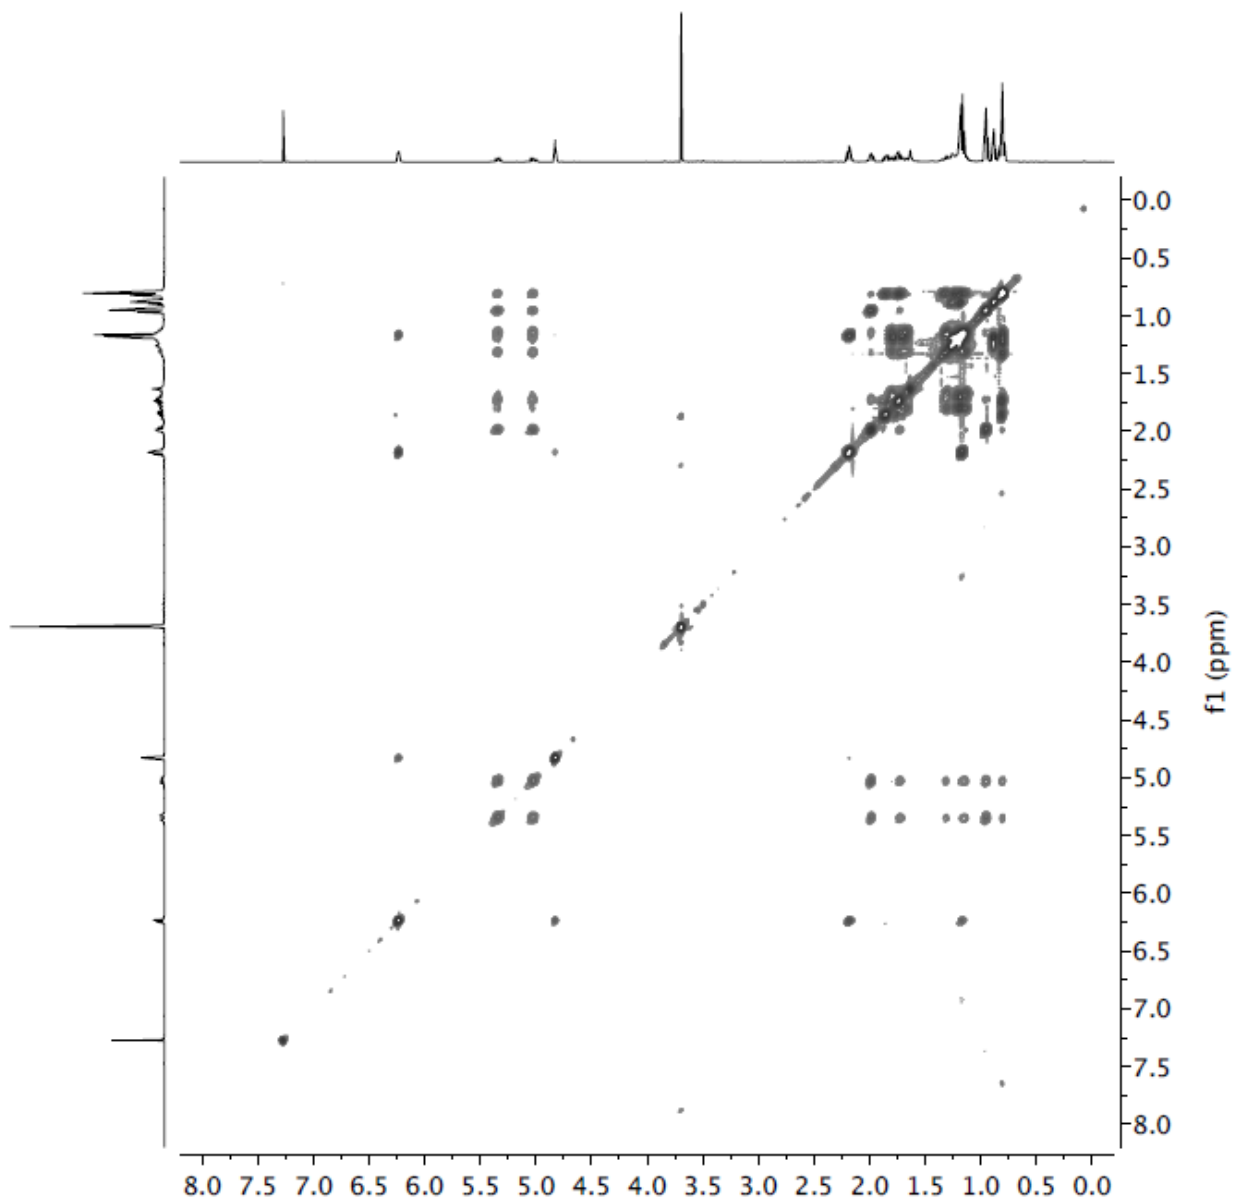

Figure S18.  $^1\text{H}$ - $^1\text{H}$ -TOCSY spectrum ( $\text{CDCl}_3$ ) of a mixture of compounds **8–9**.

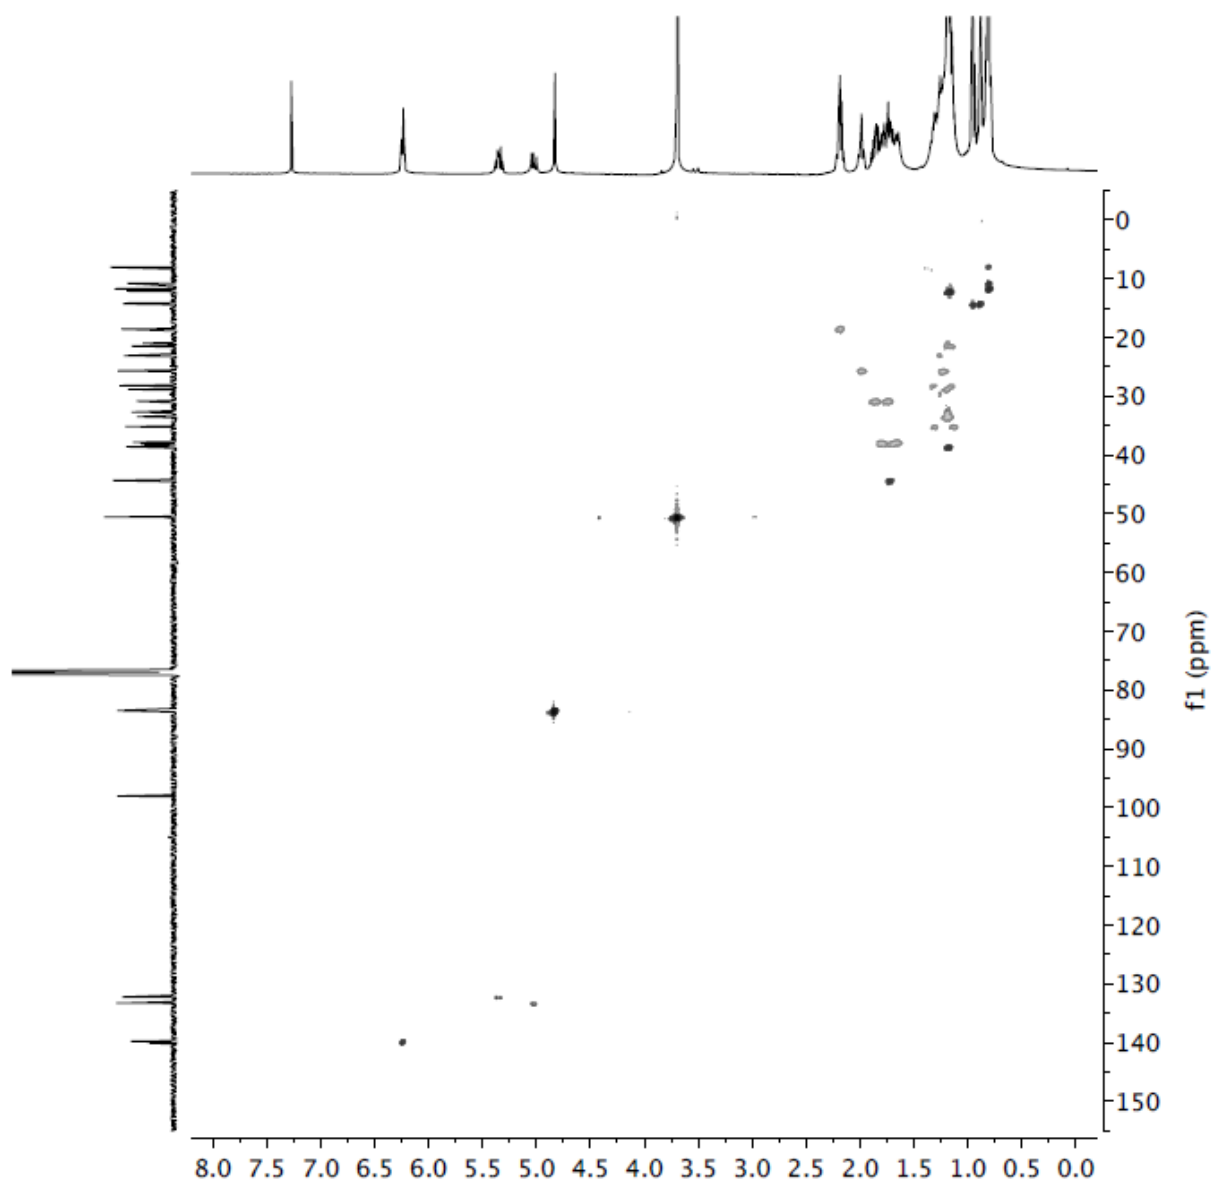

Figure S19.  $^1\text{H}$ - $^{13}\text{C}$ -HSQC spectrum ( $\text{CDCl}_3$ ) of a mixture of compounds **8–9**.

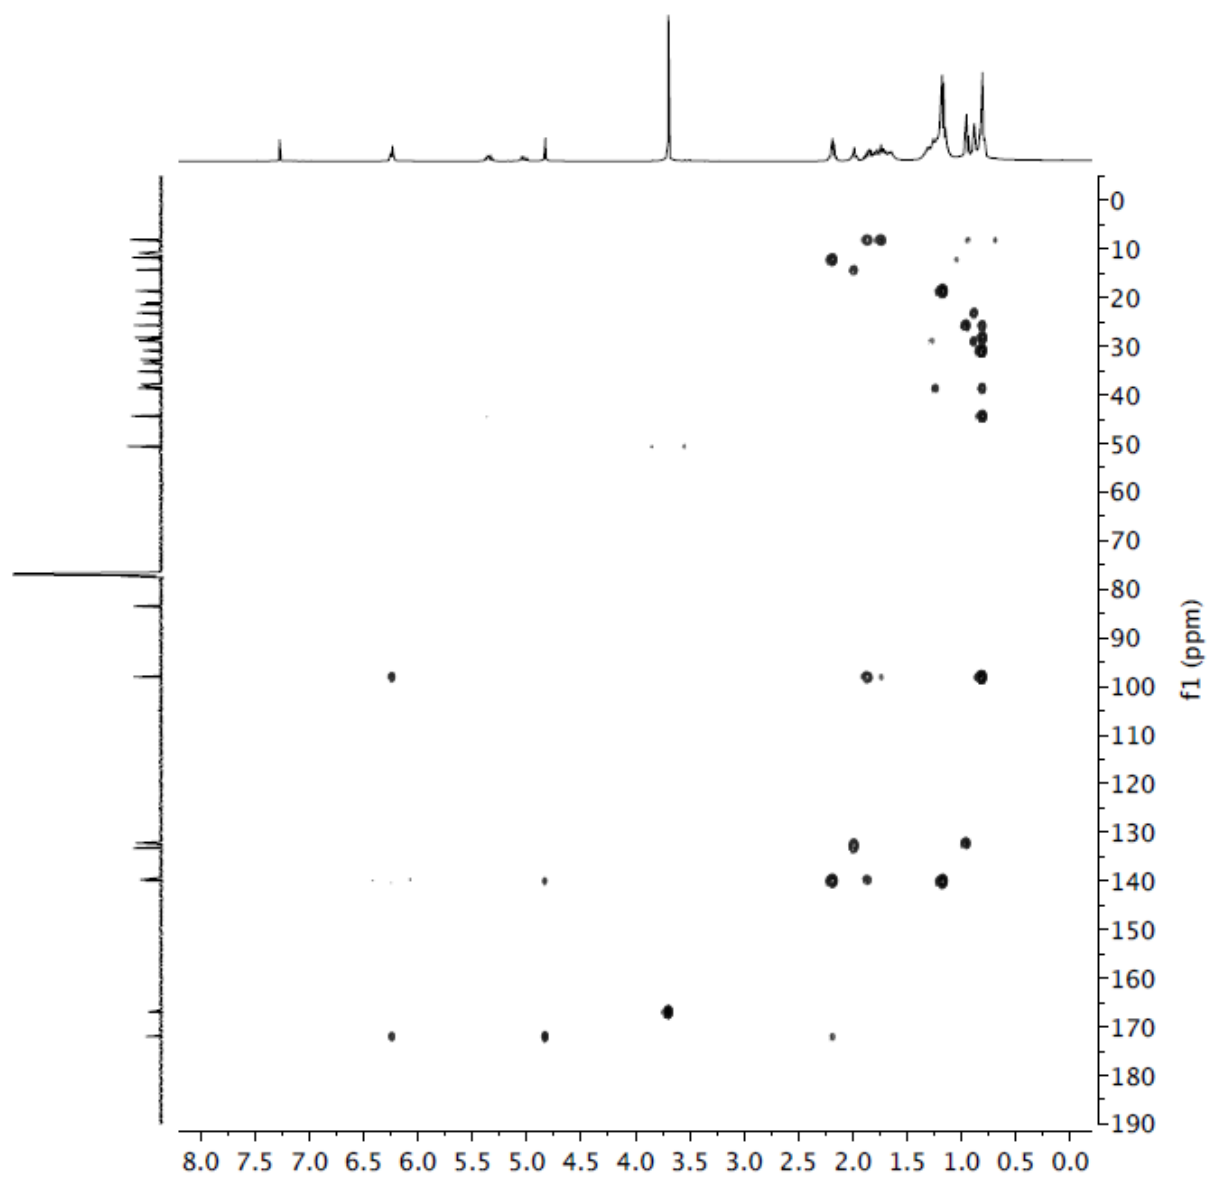

Figure S20.  $^1\text{H}$ - $^{13}\text{C}$ -HMBC spectrum ( $\text{CDCl}_3$ ) of a mixture of compounds **8-9**.

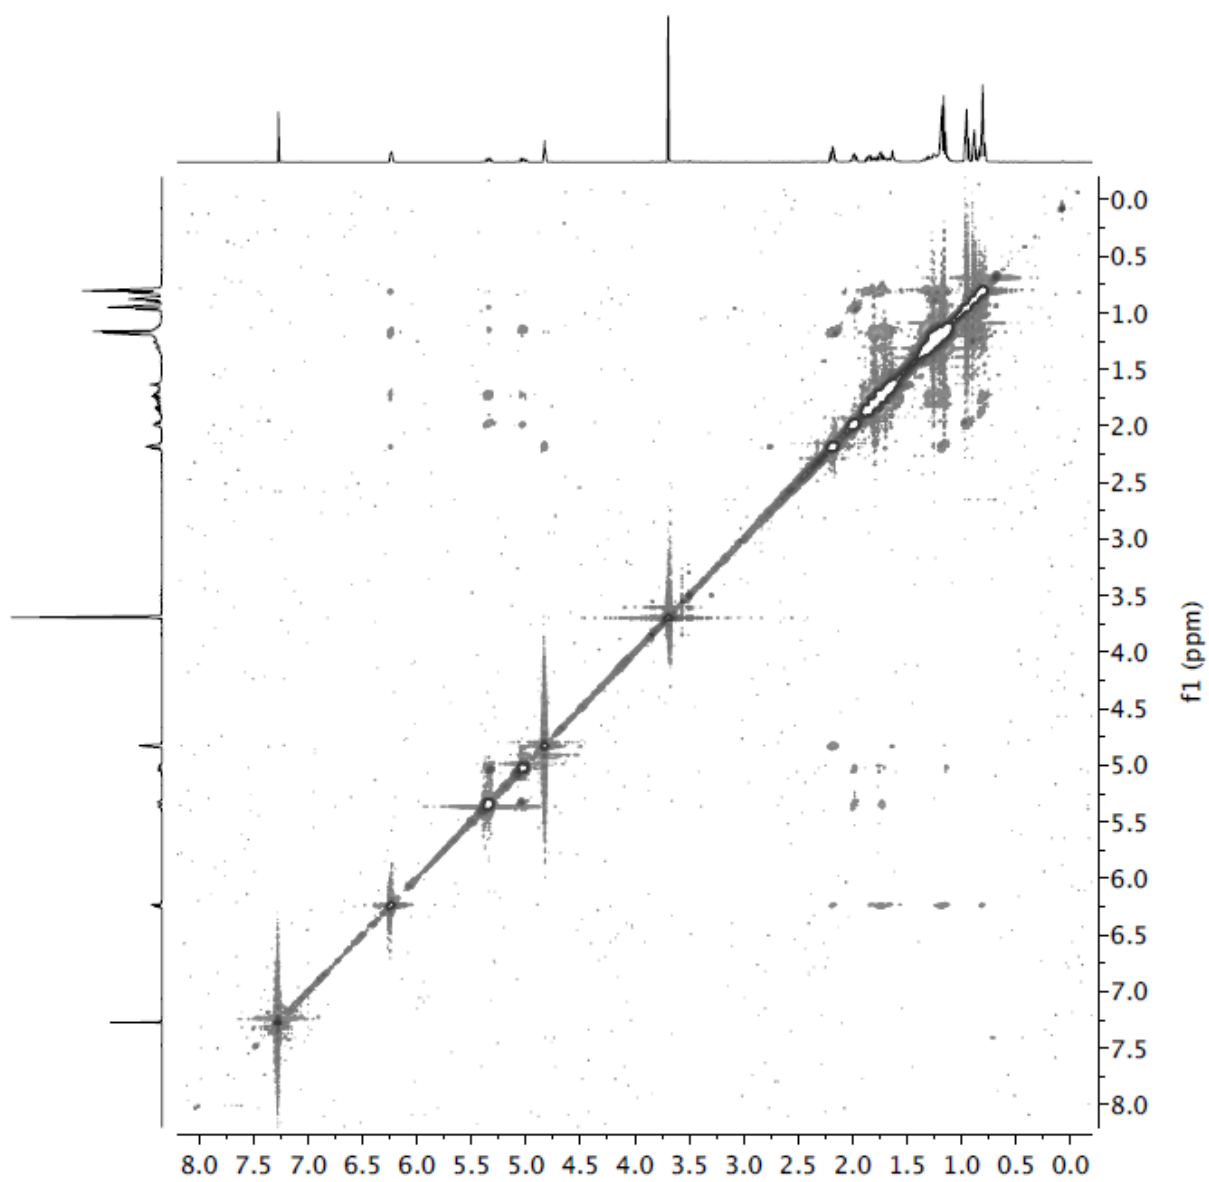

Figure S21.  $^1\text{H}$ - $^1\text{H}$ -NOESY spectrum ( $\text{CDCl}_3$ ) of a mixture of compounds **8–9**.

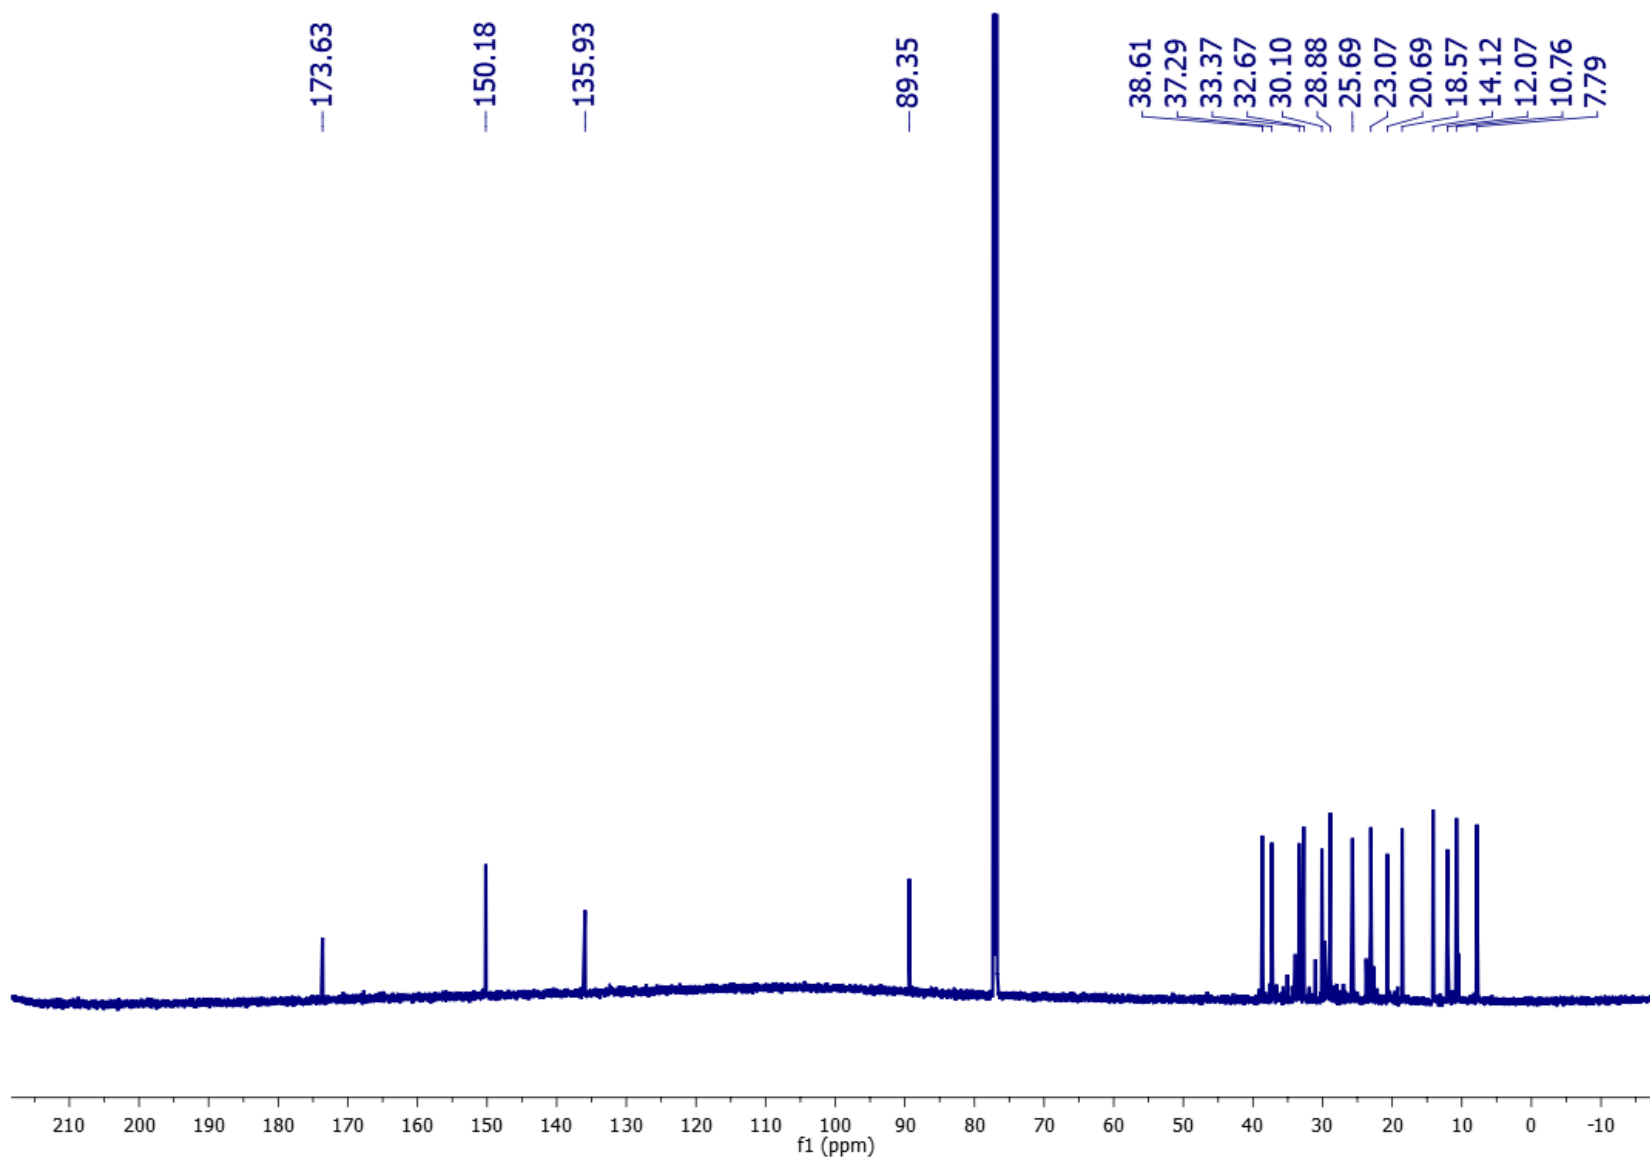

Figure S22.  $^{13}\text{C}$ -NMR spectrum ( $\text{CDCl}_3$ , 125 MHz) for semi-synthetic 9,10-dihydroplakortone G (**8**) (~90% pure).

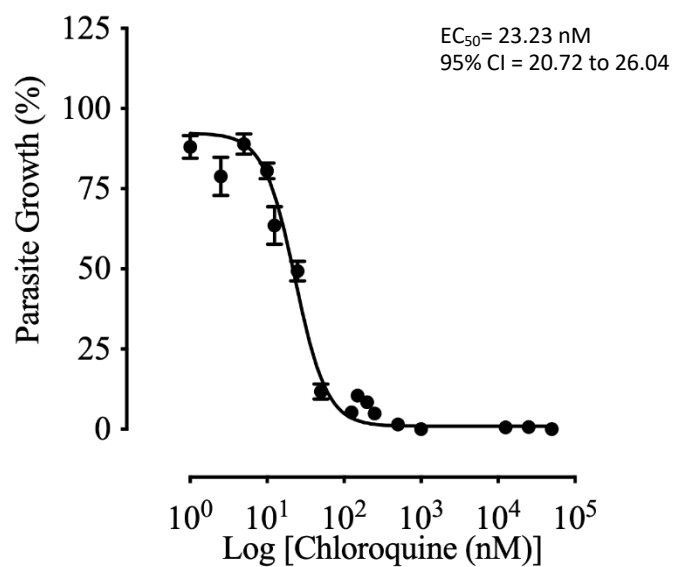

Figure S23. Dose-response curve of the parasite *Plasmodium berghei* for chloroquine (positive control).

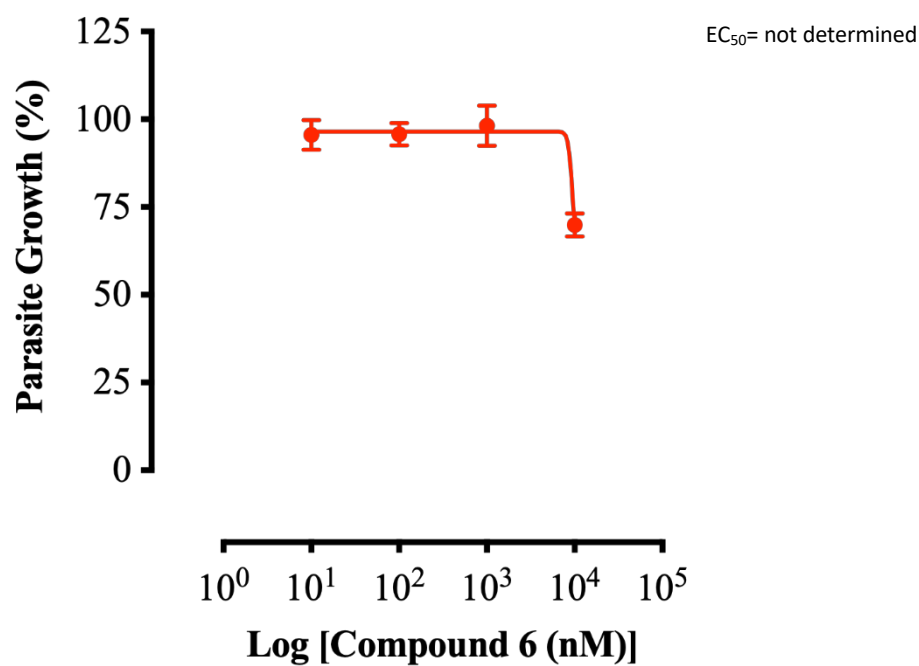

Figure S24. Dose-response curve of the parasite *Plasmodium berghei* for gracilioether M (**6**)



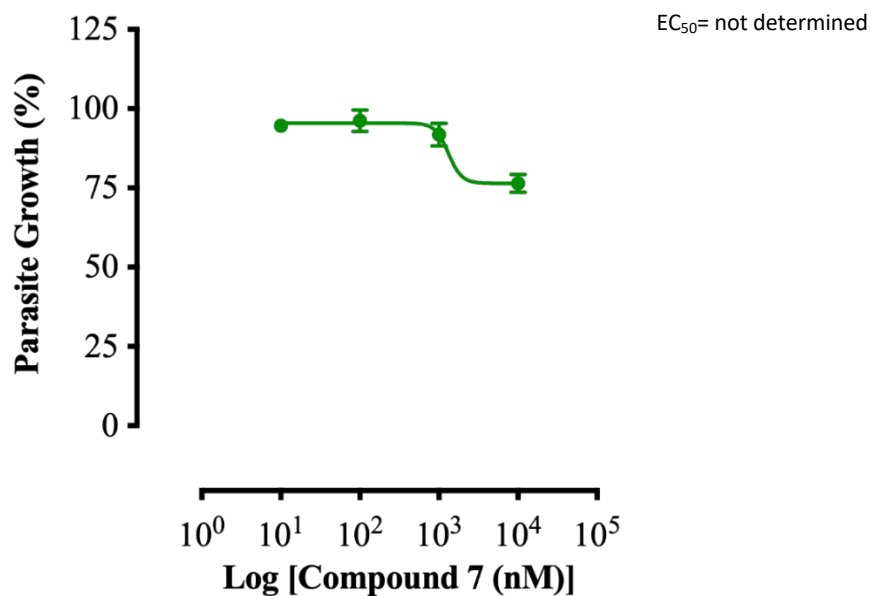

Figure S25. Dose-response curve of the parasite *Plasmodium berghei* for 11,12-dihydrogracilioether M (7).

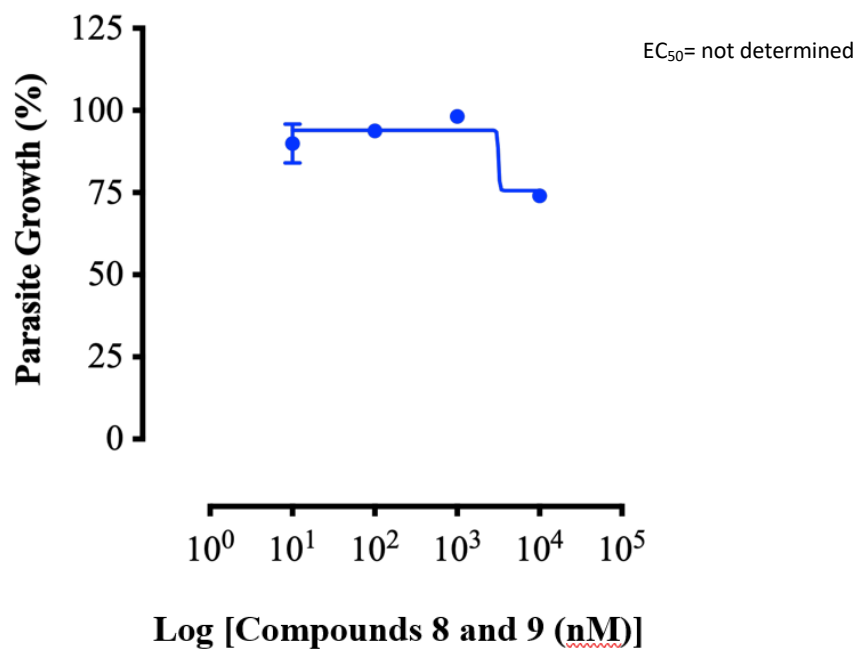

Figure S26. Dose-response curve of the parasite *Plasmodium berghei* for a mixture of compounds **8–9**
